# Supplementary material for: Electrostatic Assembly of Anti-Listeria Bacteriophages on a Self-Assembled Monolayer of Aminoundecanethiol: Film Morphology and Charge Transfer Studies
Source: Preprints.org preprint supplement (doi:10.20944/preprints202302.0228.v1), 2023-02-14
Supplement: Supplementary file 1 [file supplementary]

*Electronic Supplementary Information on:*

Electrostatic Assembly of Anti-ListeriaBacteriophages on a Self-Assembled Monolayer of Aminoundecanethiol: Film Morphology and Charge Transfer Studies

*Paula M. V. Fernandes, Carlos M. Pereira, José M. Campiña**

1 Centre for Research in Chemistry of the University of Porto (CIQUP), Dept. of Chemistry and Biochemistry, Faculty of Sciences, Rua do Campo Alegre, s/n, 4169-007, Porto, Portugal.

S.1. Randles-type Equivalent Circuit . . . . . . . . . . . . . . . . . . . . . . . . . . . . . . . . . . . 2

S.2. Supplementary Results . . . . . . . . . . . . . . . . . . . . . . . . . . . . . . . . . . . . . . . . . . .2

S.2.1. *Electrochemical Data . . . . . . . . . . .* . . . . . . . . . . . . . . . . . . . . . . . . . . . .2

S.2.2. *AFM . . . . . . . . . . . . . . . . . . . . . . . . . . . . . . . . . . . . . . . . . . . . . . . . . . . . .*6

** Corresponding Author Information:* José M. Campiña (PhD), E-mail: [jpina@fc.up.pt](mailto:jpina@fc.up.pt), Tel: +351 220 402 643

**S.1. Randles-type Equivalent Circuits**

The variation of the Randles circuit [43] used in this work is referred to as *R1QR2W* (see an schematic representation in Scheme S1). The circuit includes a Constant Phase Element (CPE or Q) instead of the typical capacitor in the Randles circuit. The CPE accounts for the topological imperfections and roughness of the electrode surface. The rest of the components are described as follows: *R1* is the electrolyte resistance, *R2* accounts for the charge transfer resistance, and *W* represents theWarburg diffusion impedance. When the charge transfer is the rate determining step, the Warburg element can be neglected and the system is electrically equivalent to a *R1QR2* circuit.

CPE


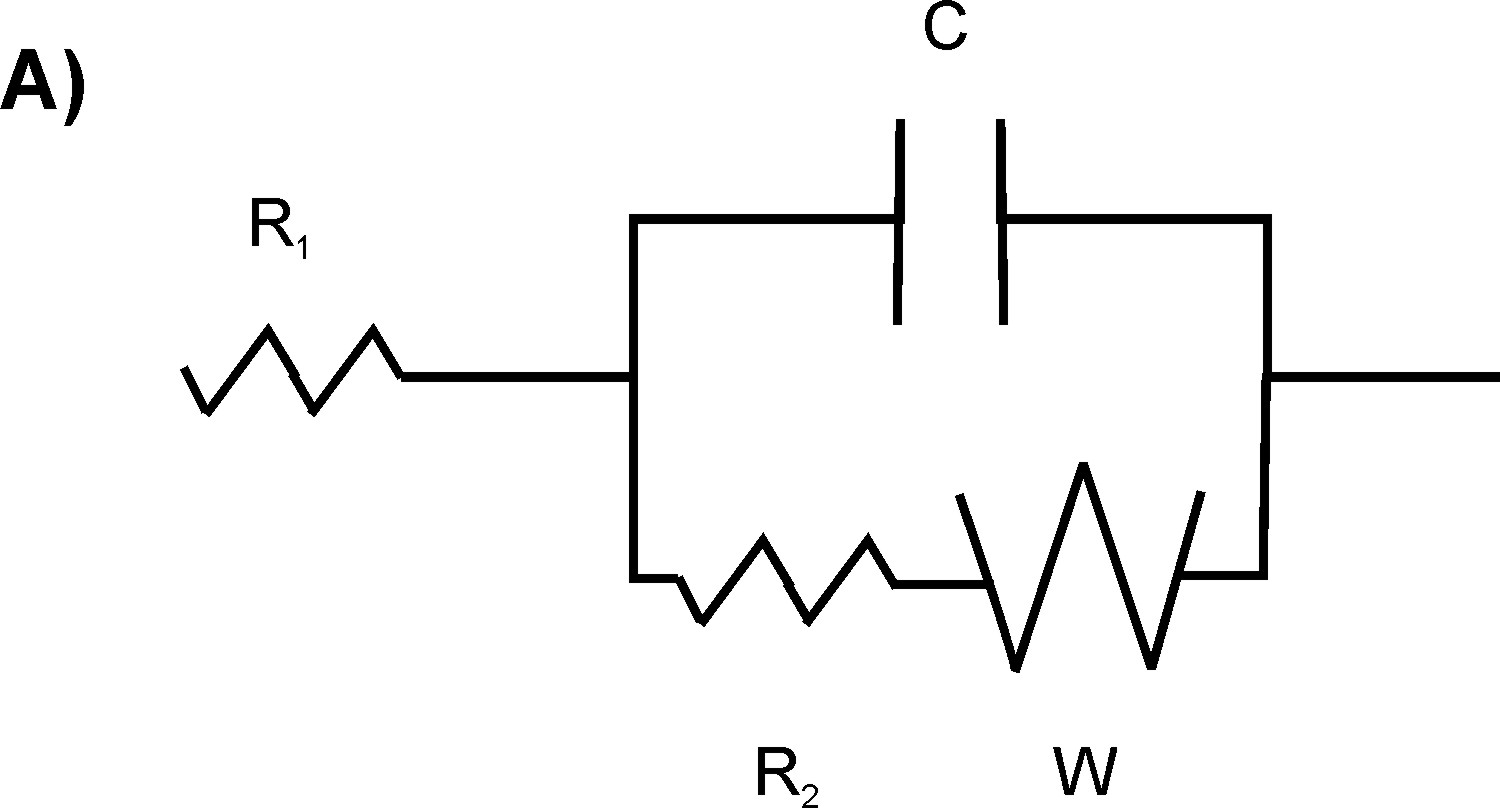


**Scheme S1** – *Randles-type circuit used to fit the impedance data acquired in this work.*

**S.2. Supplementary Results**

**S.2. 1 Electrochemical Data**


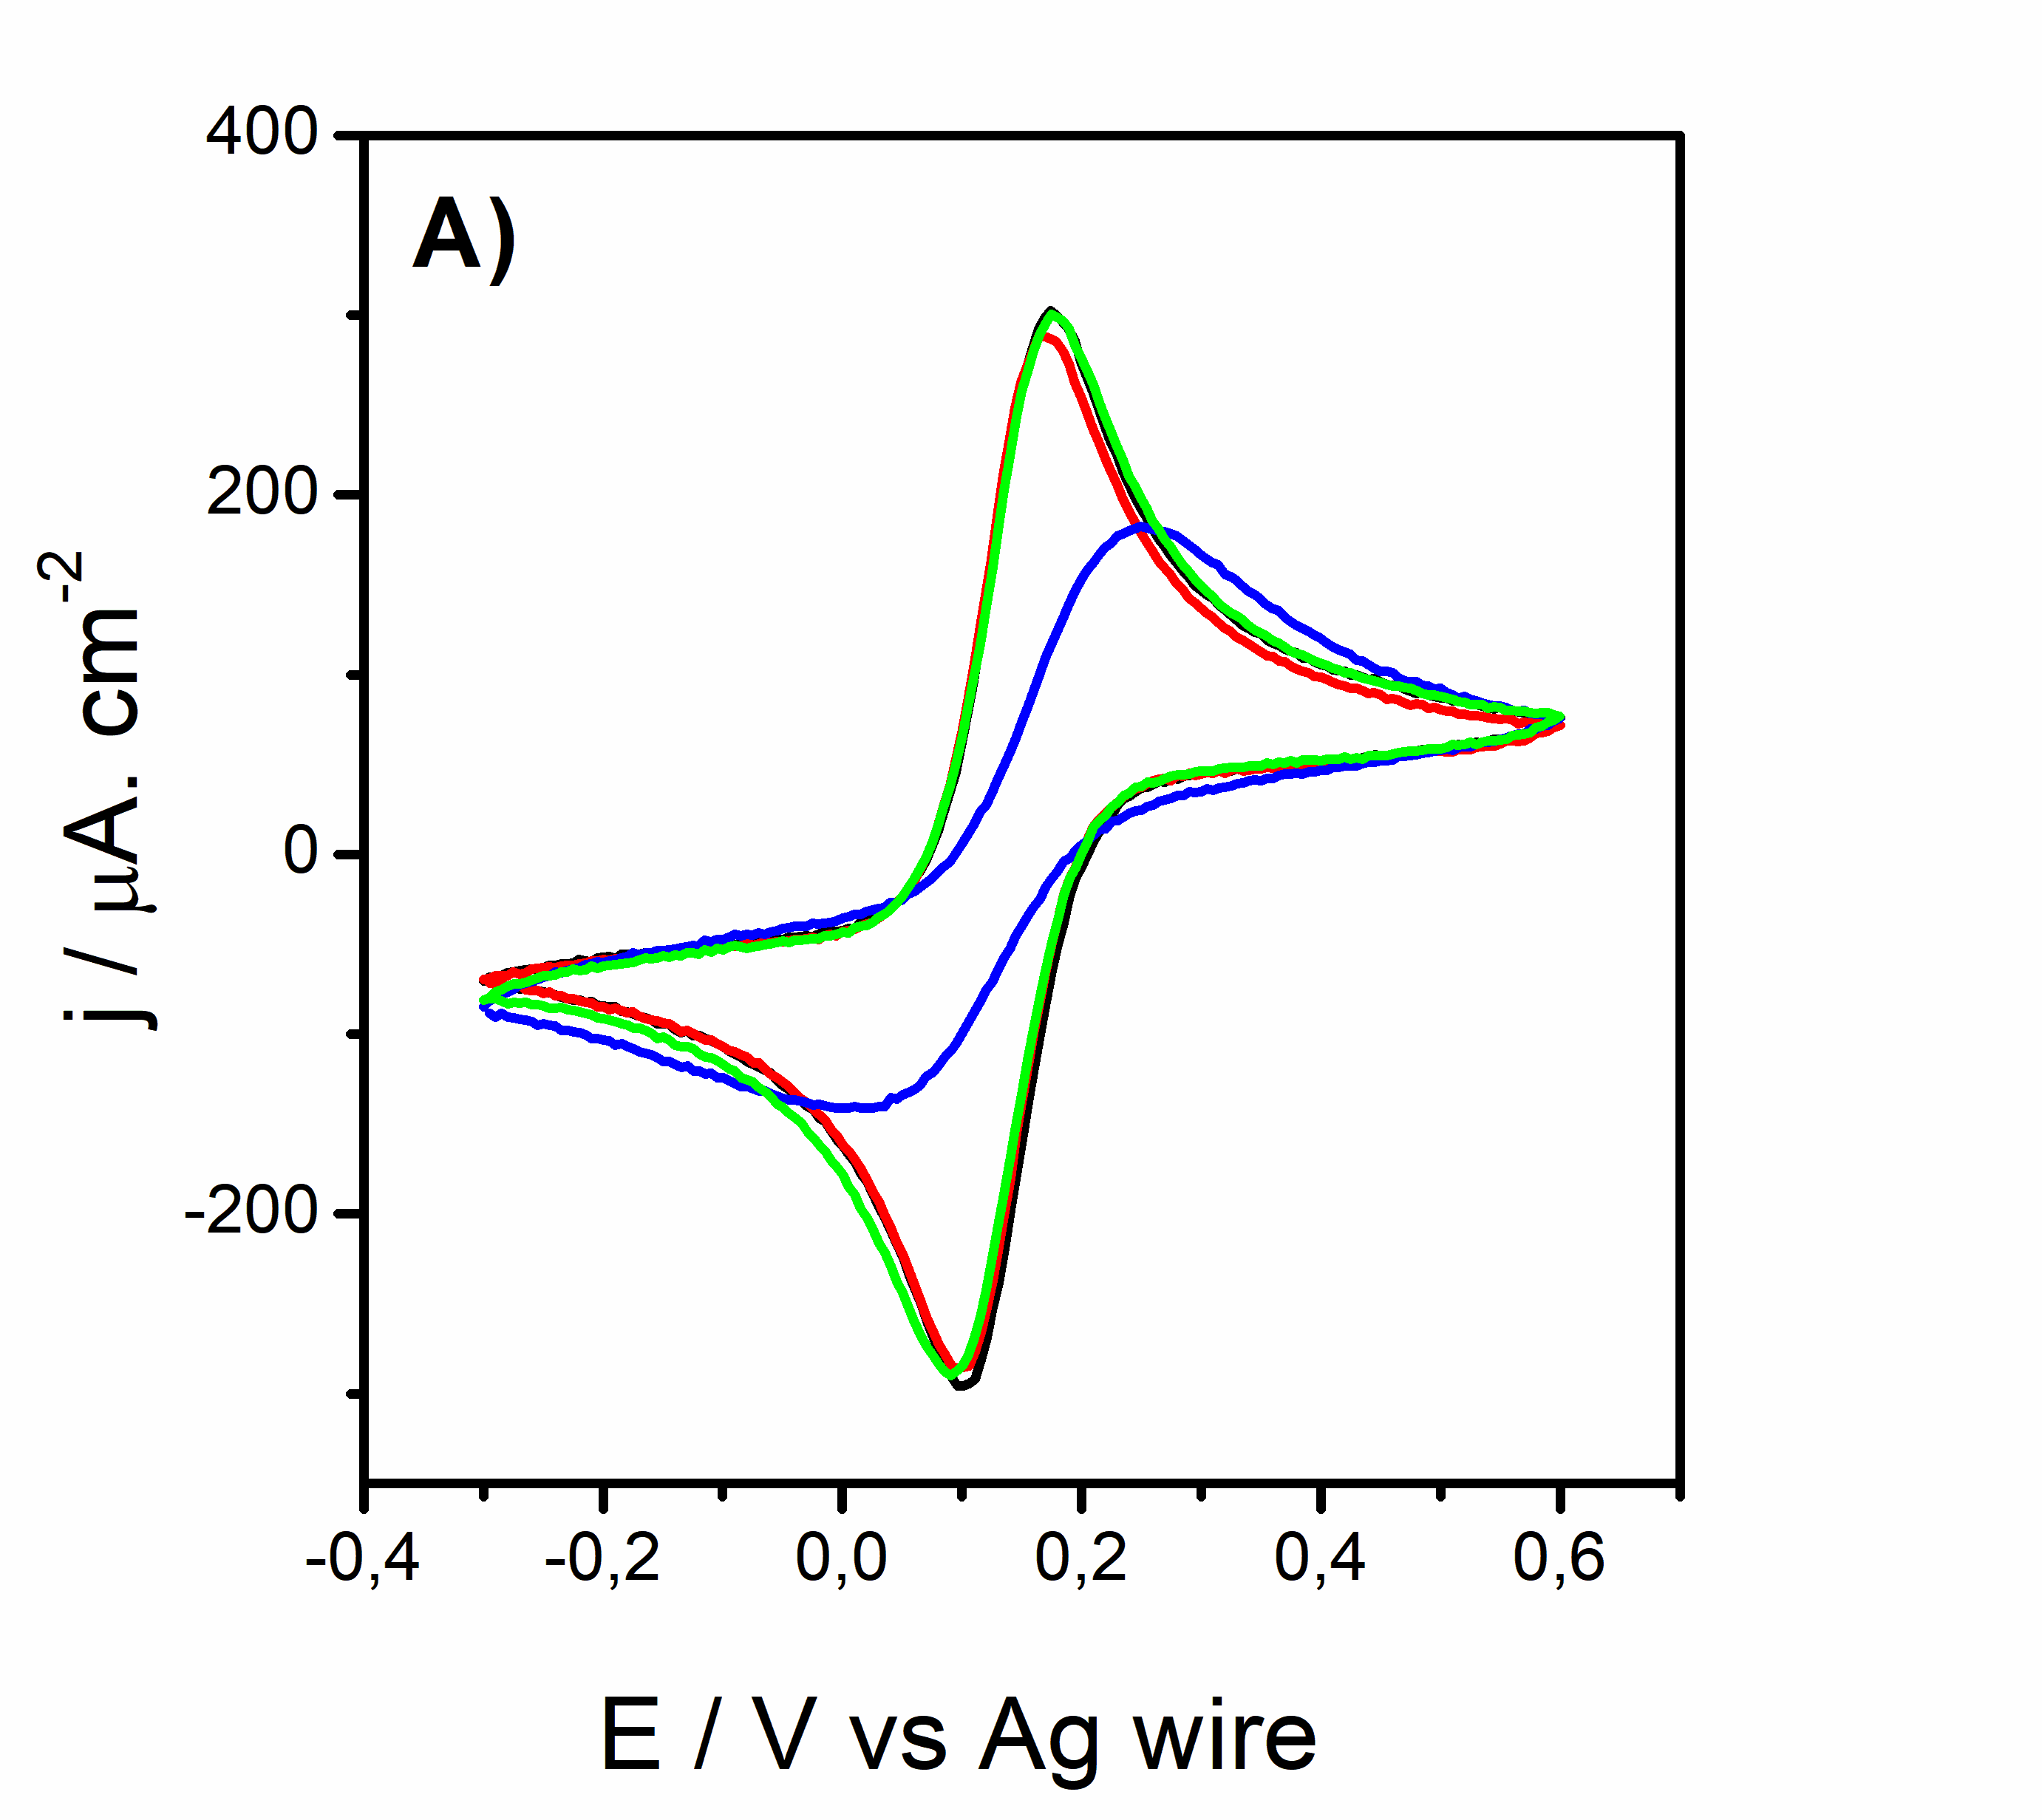

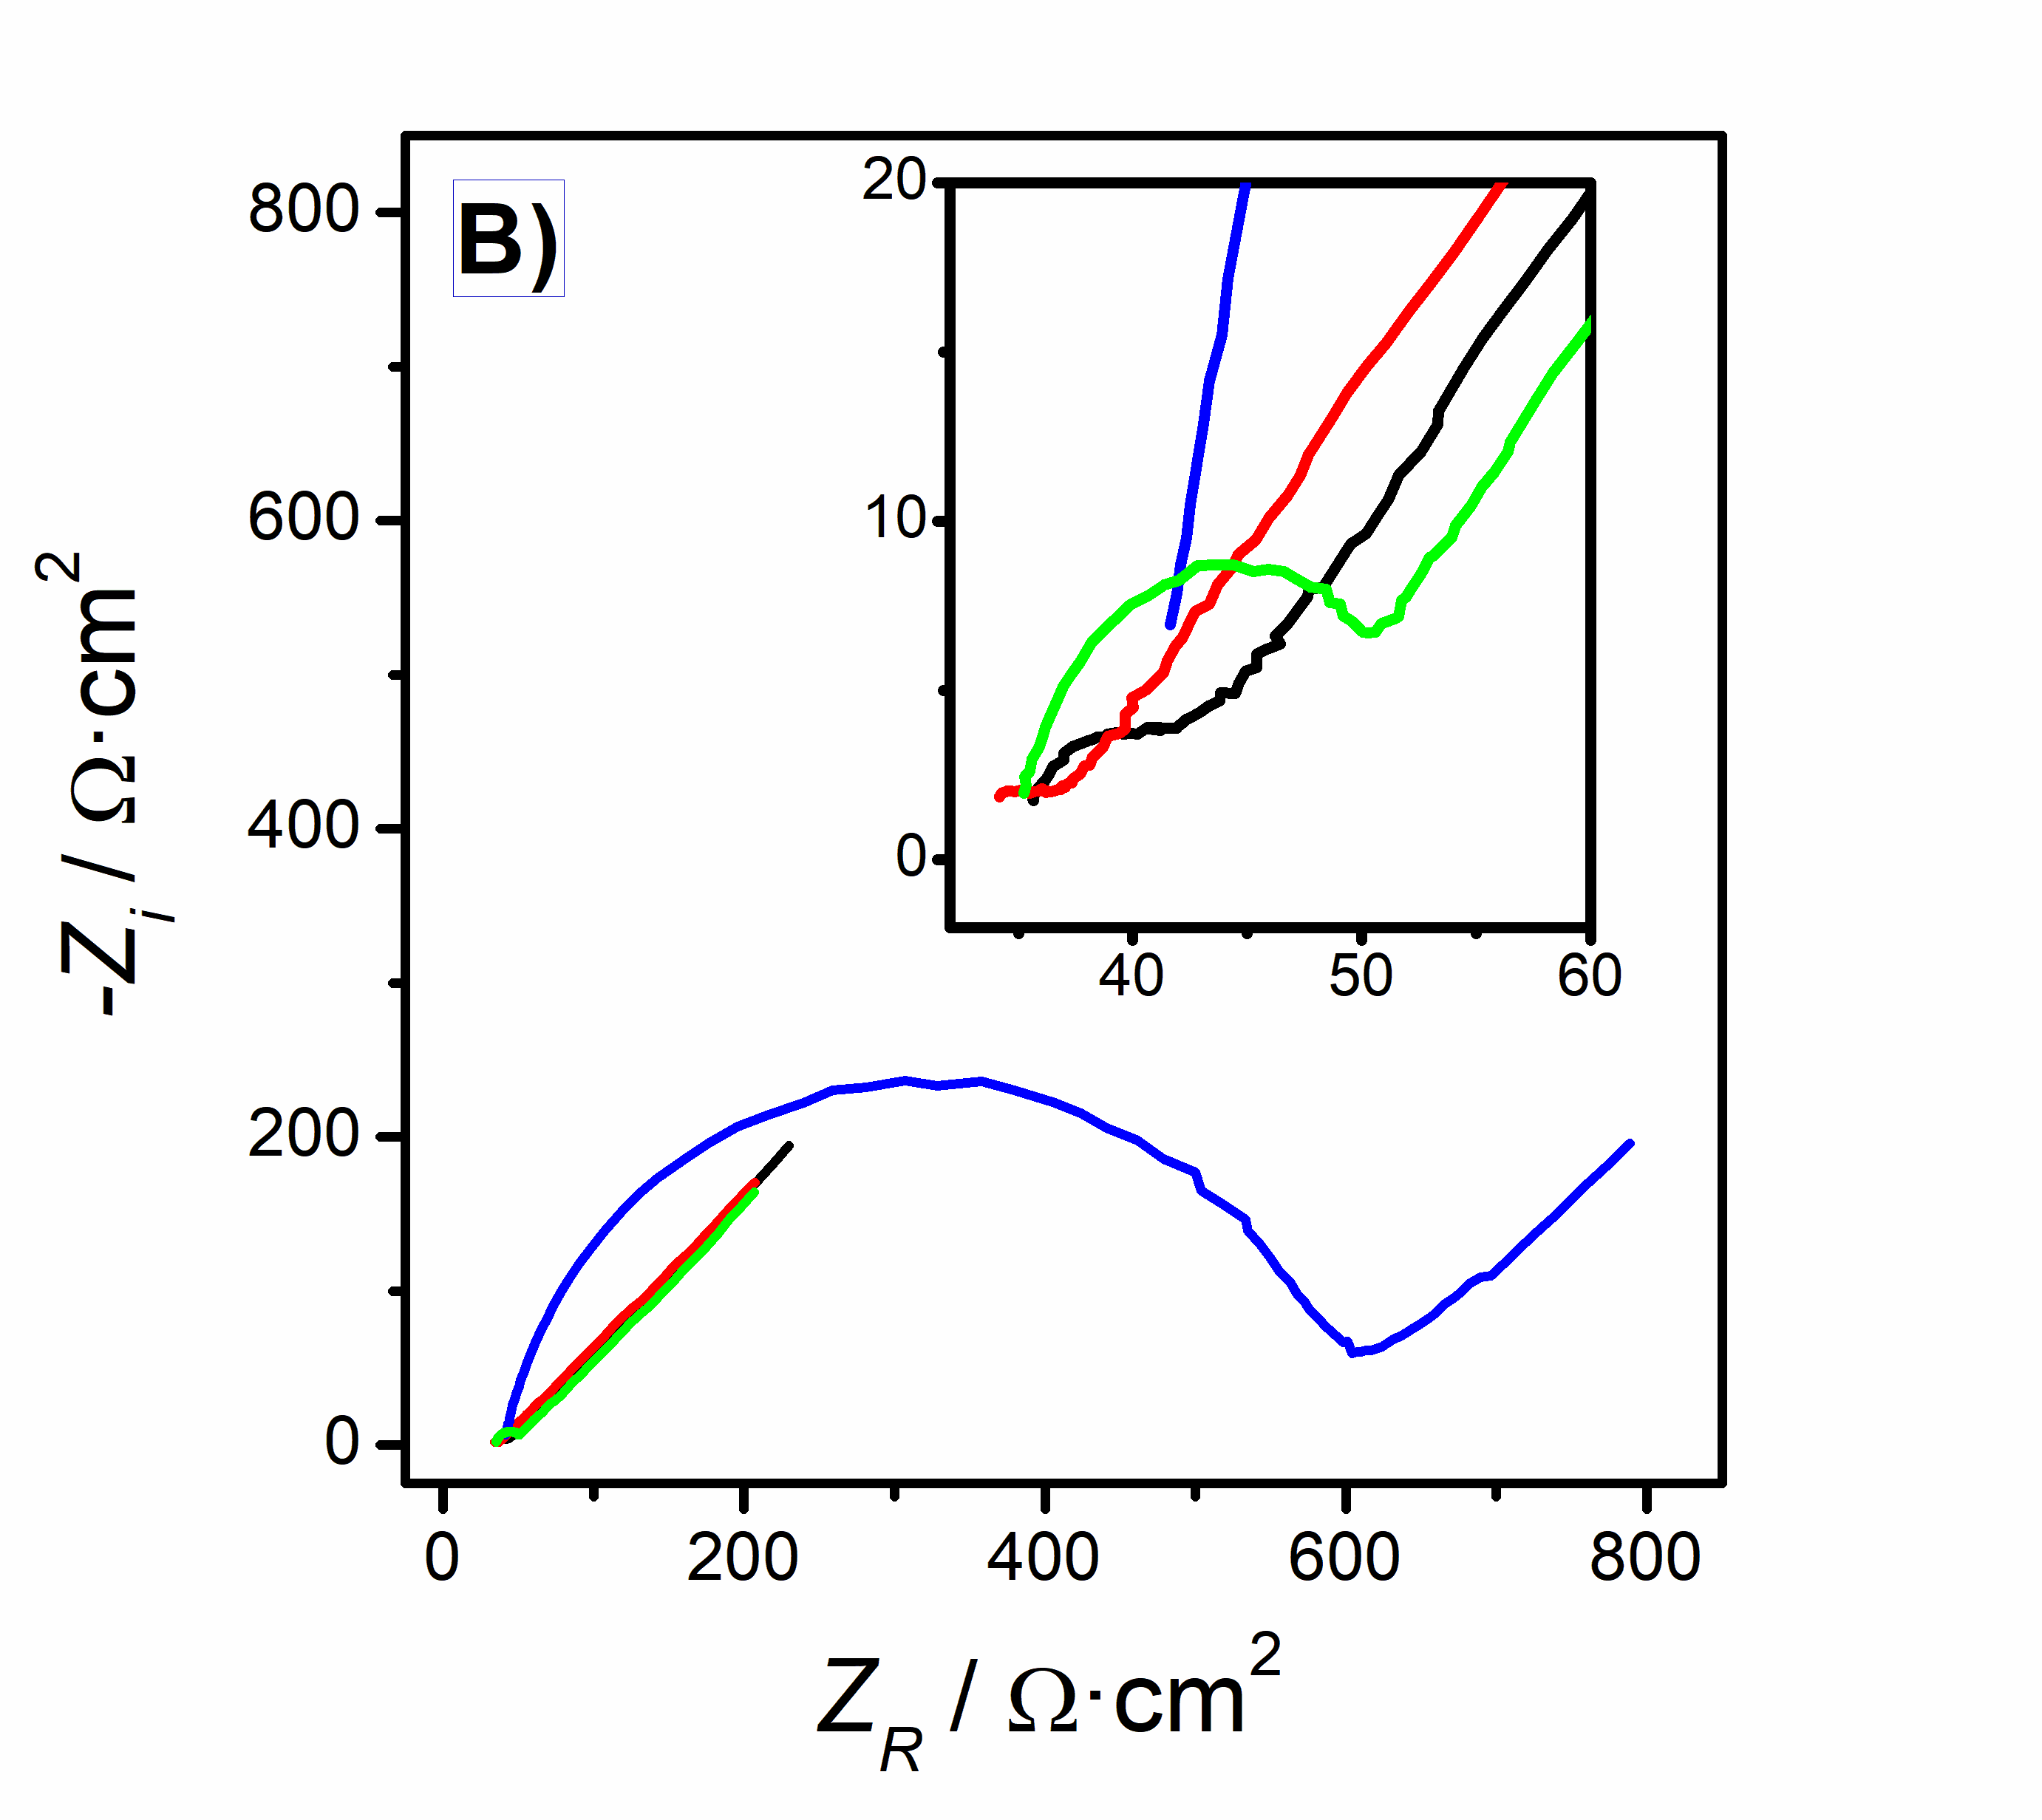


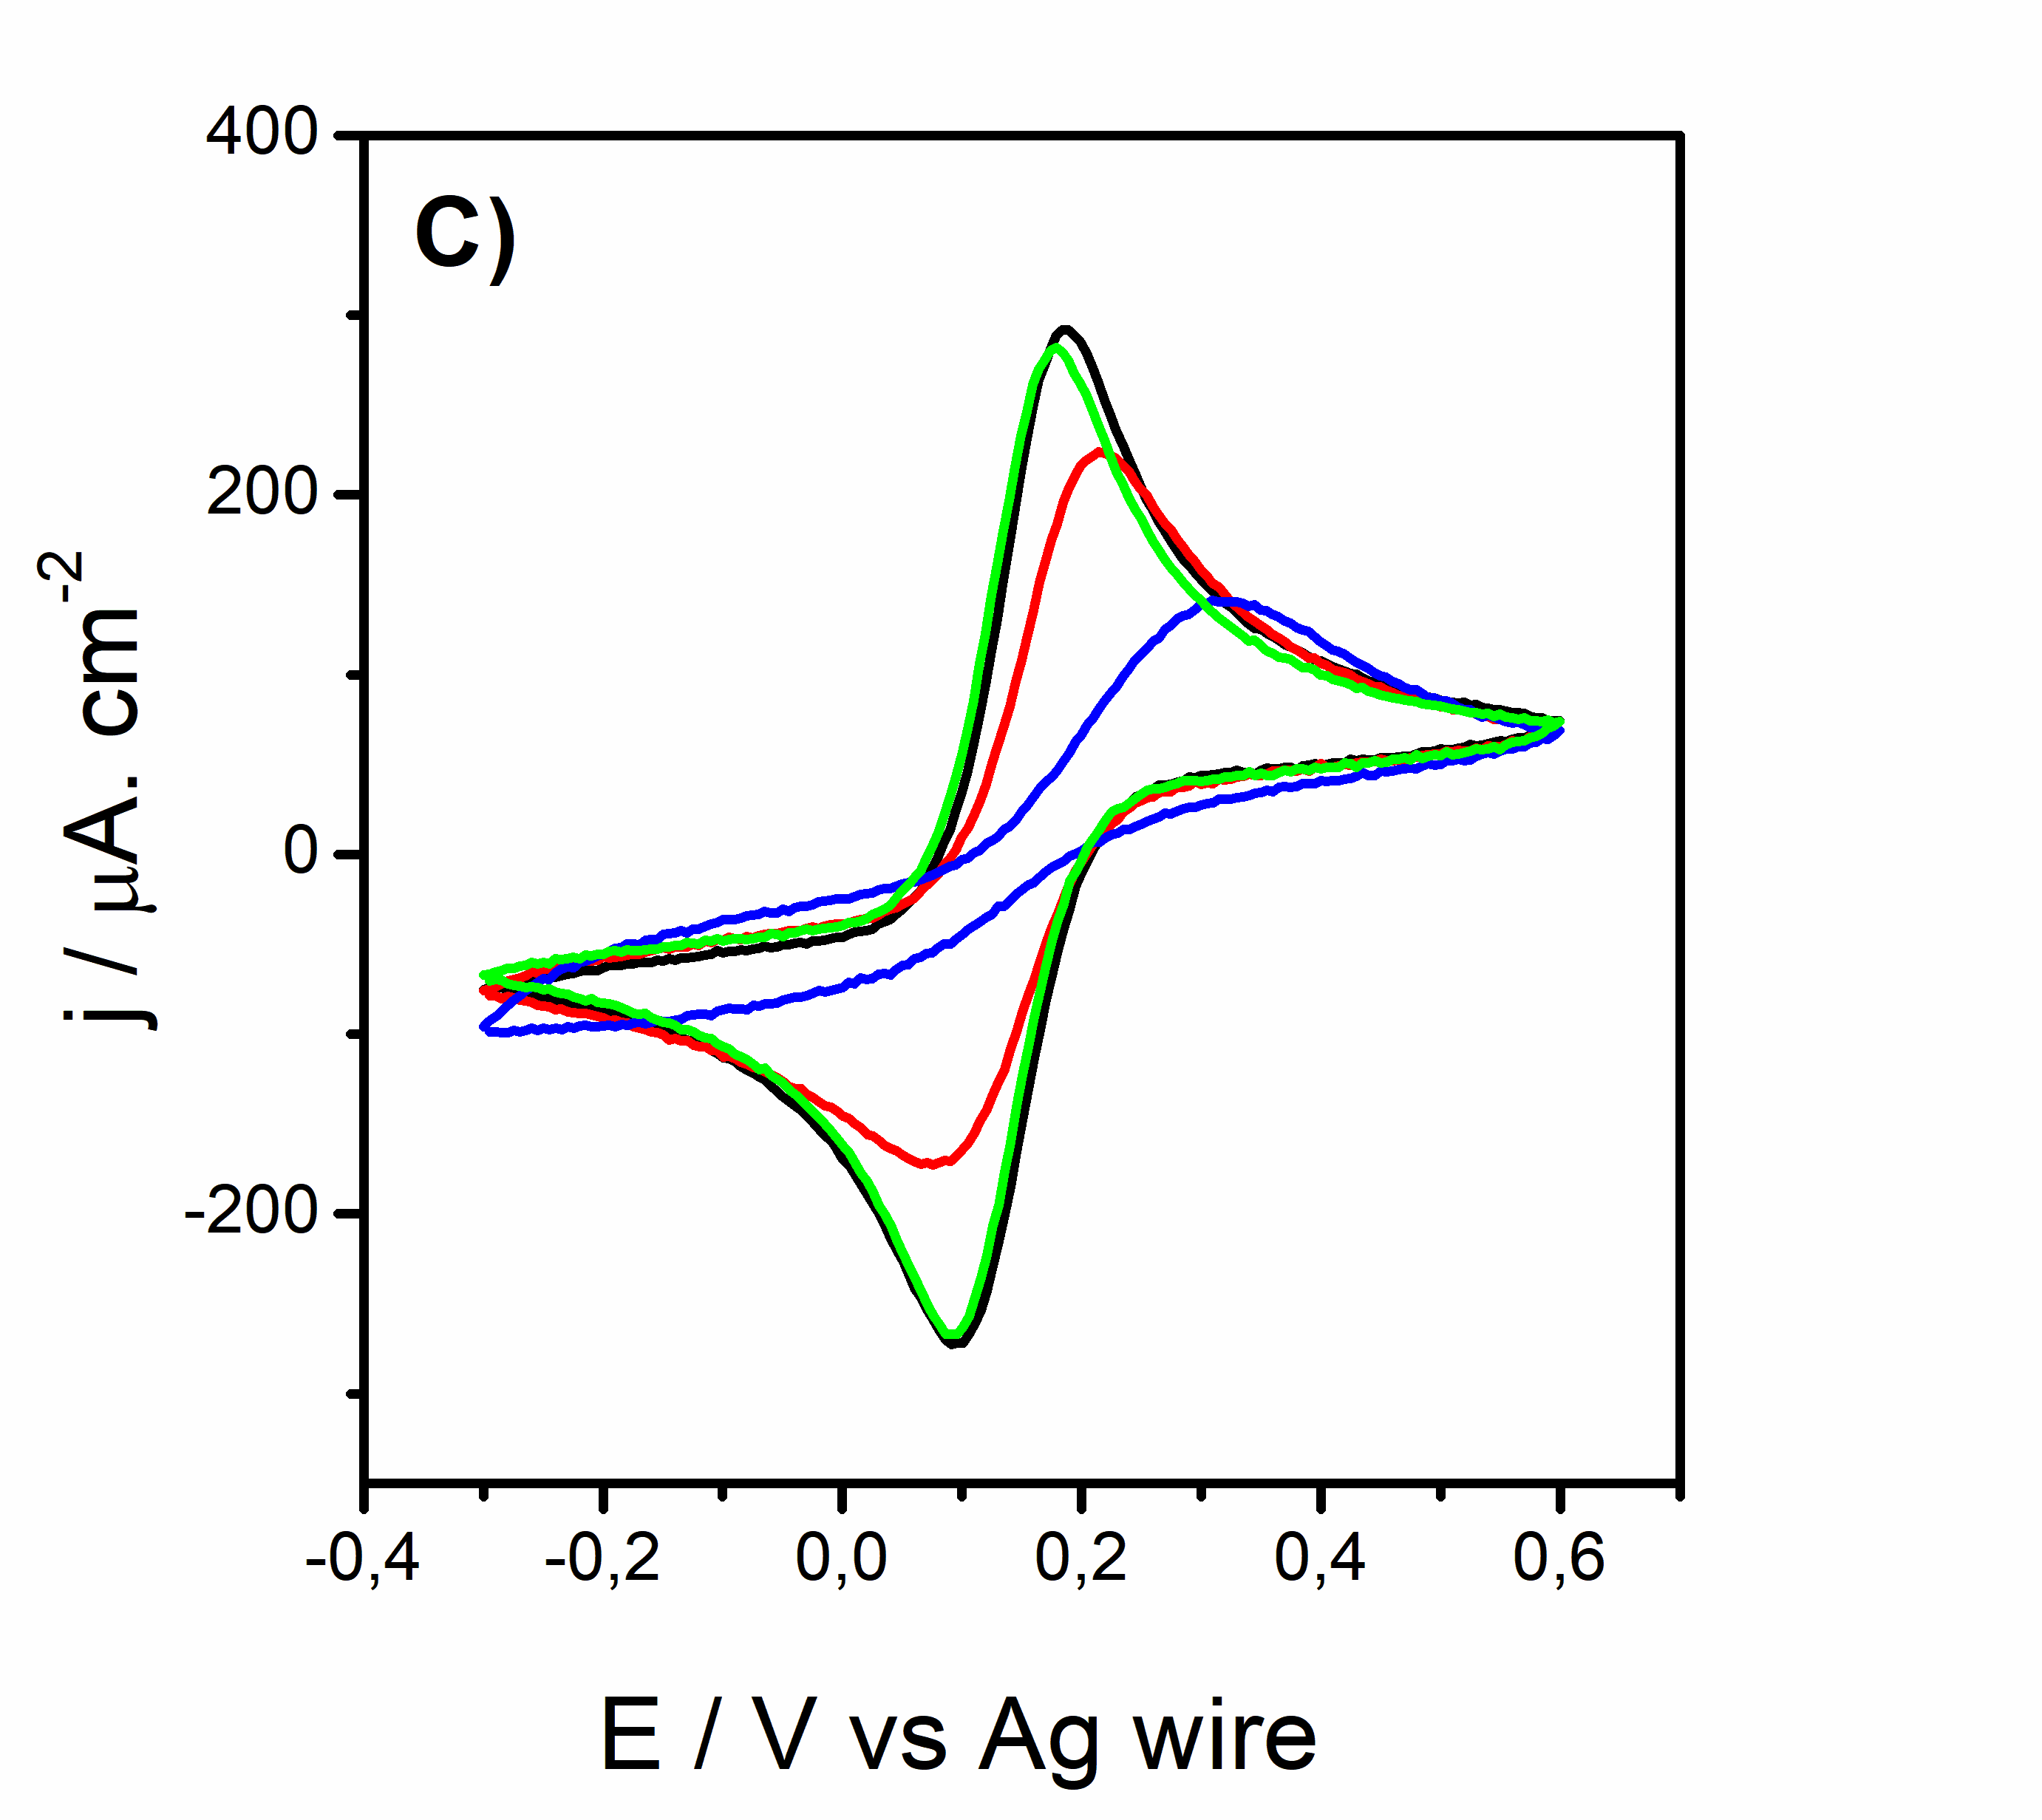

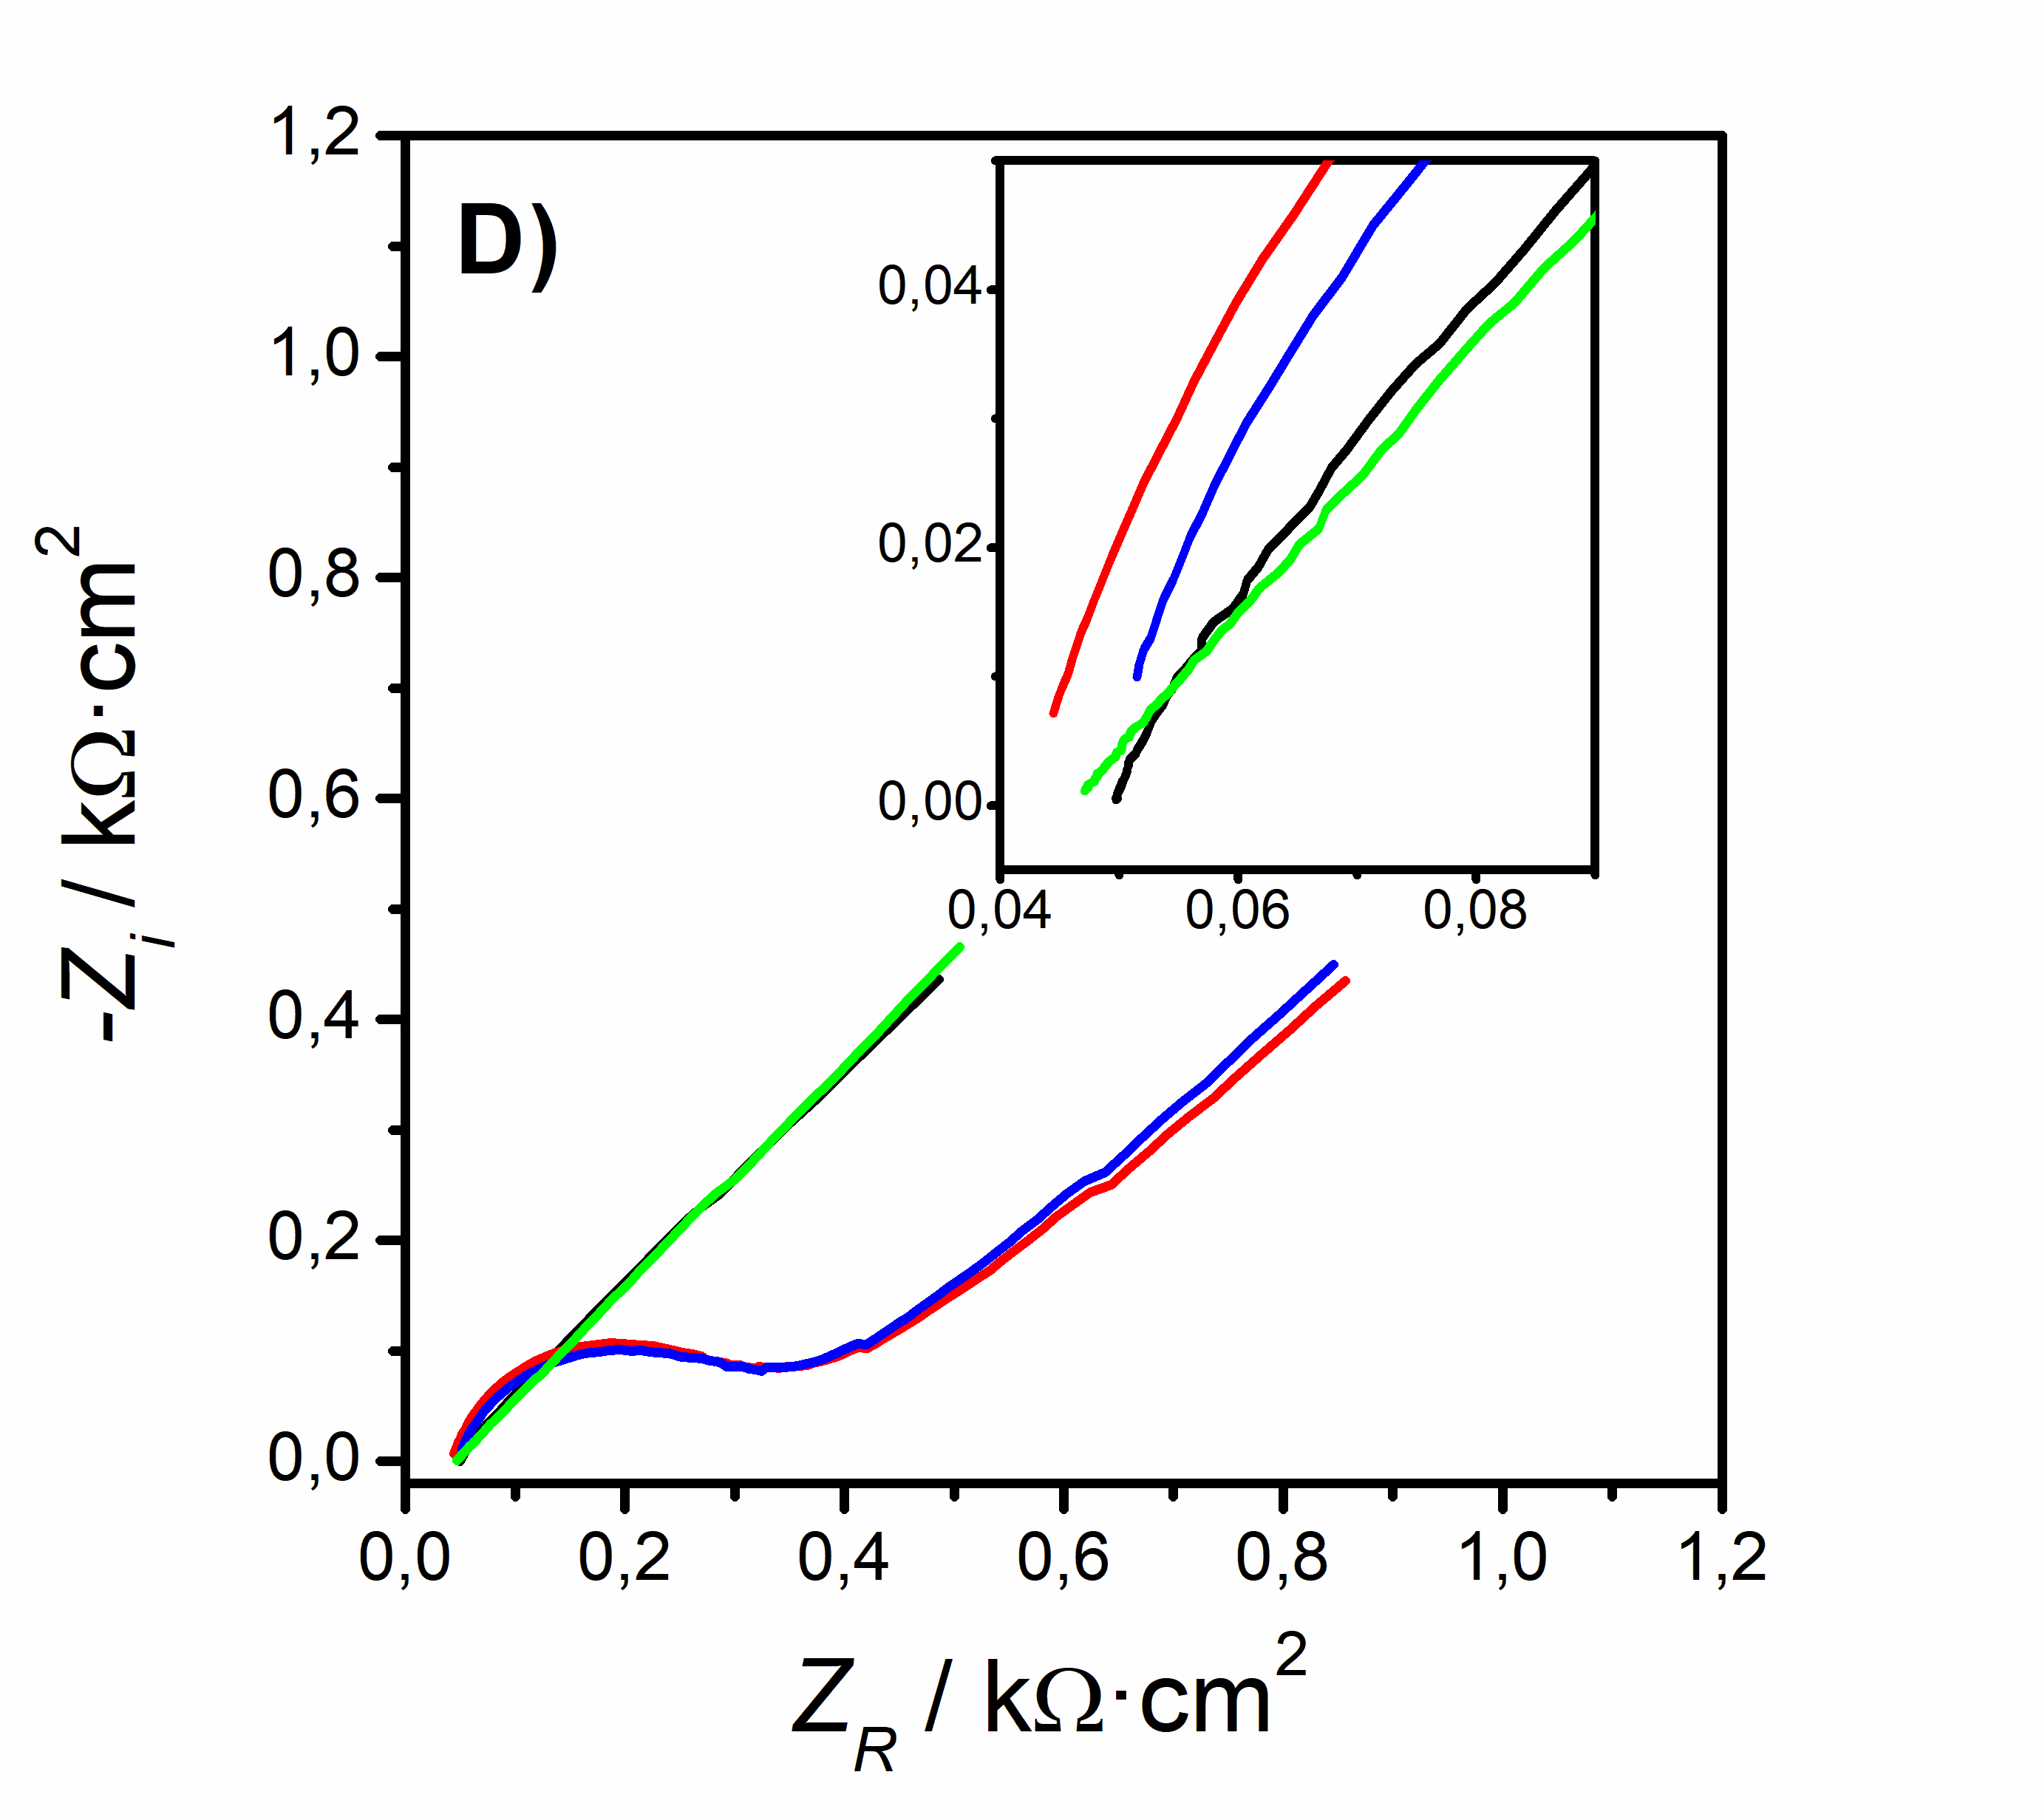


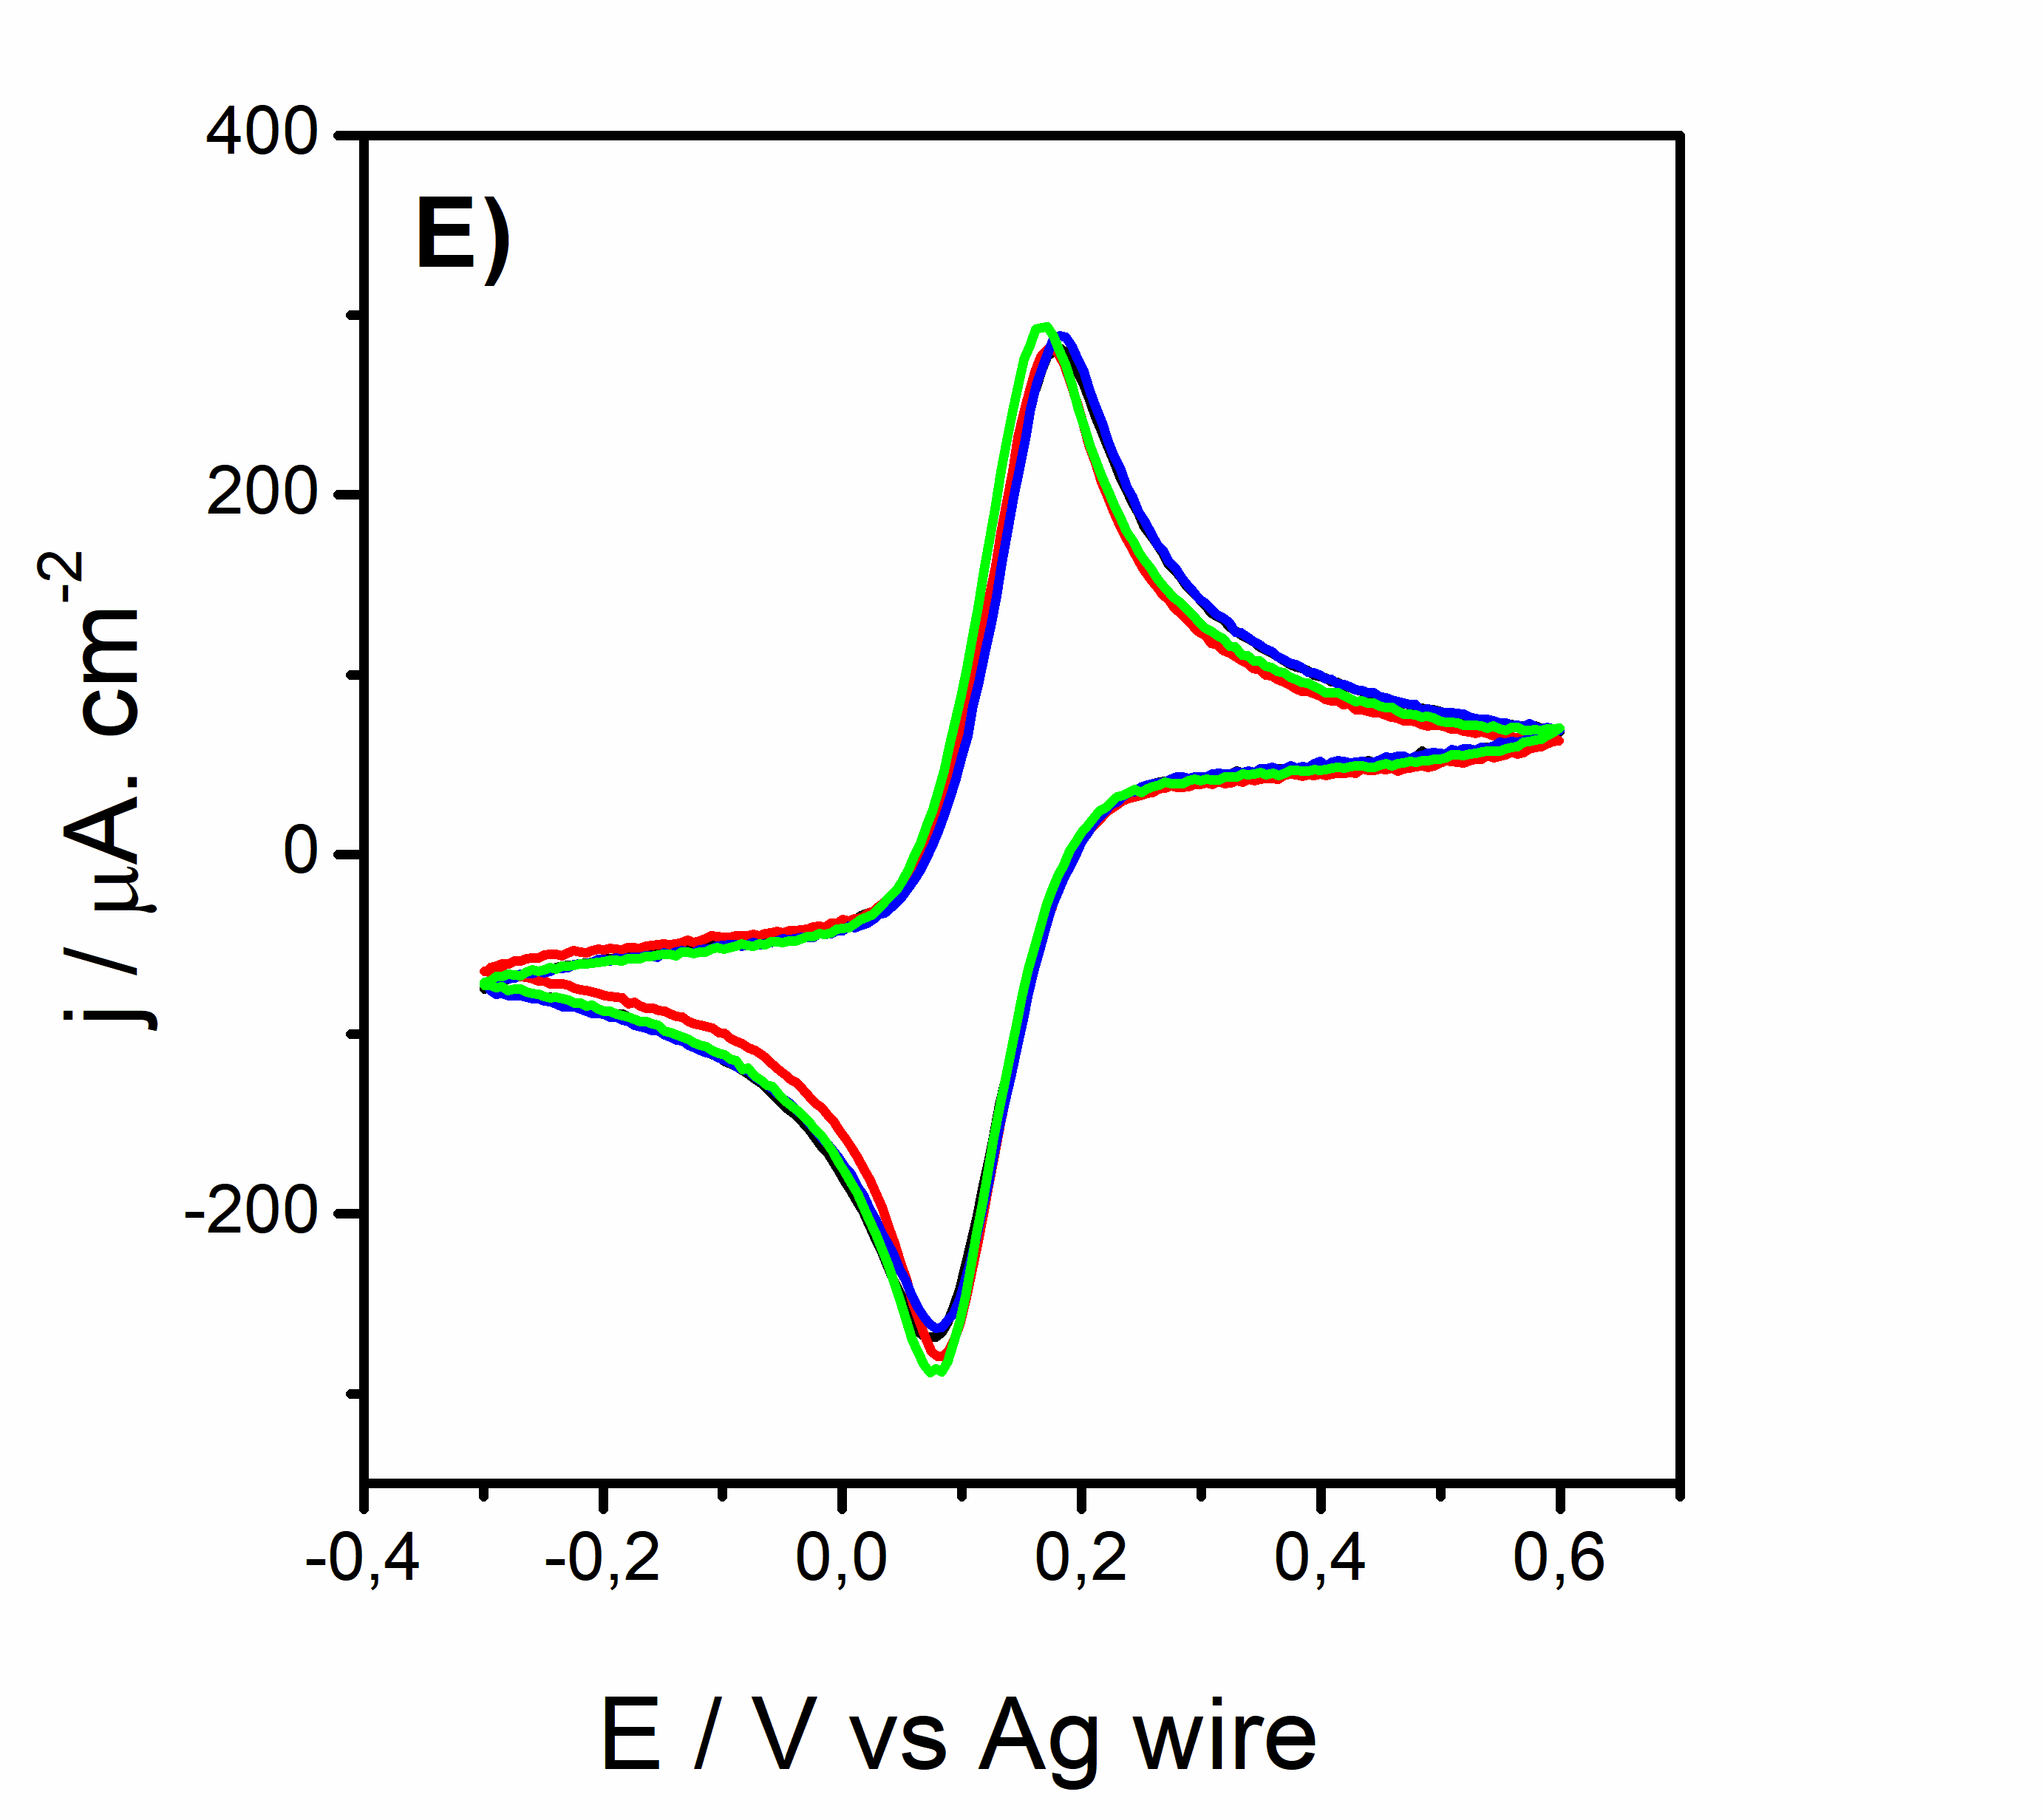

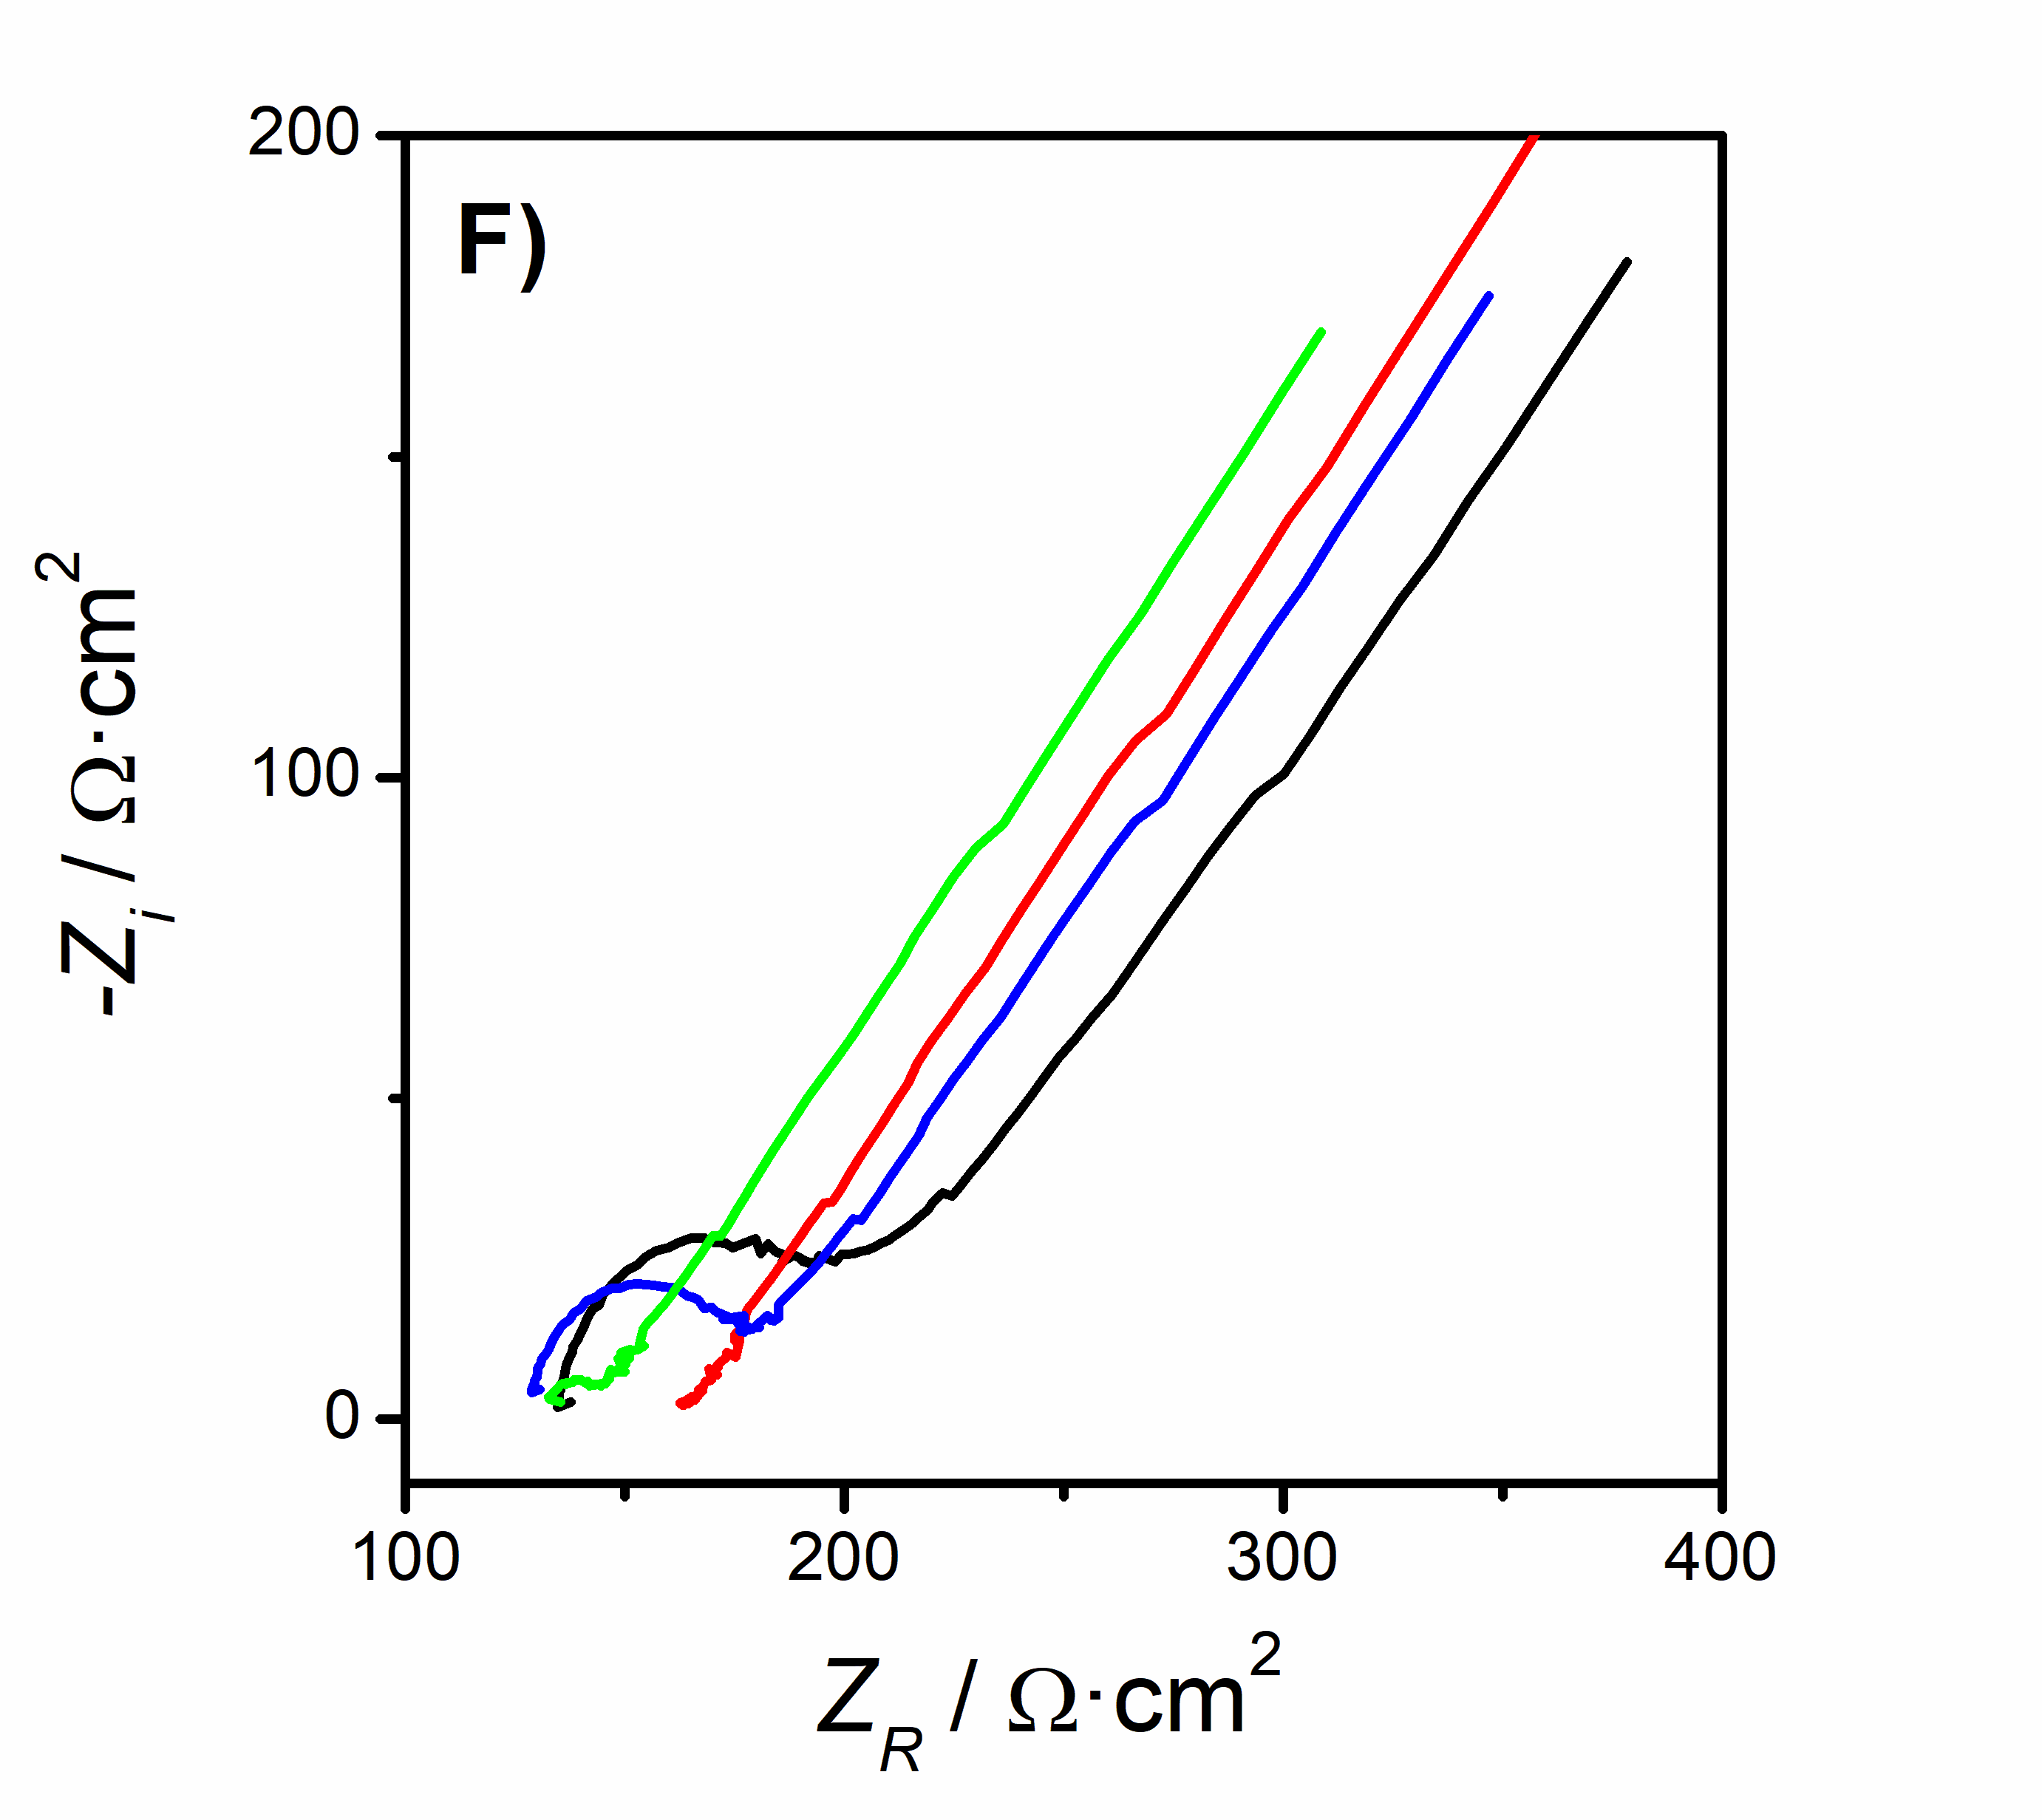


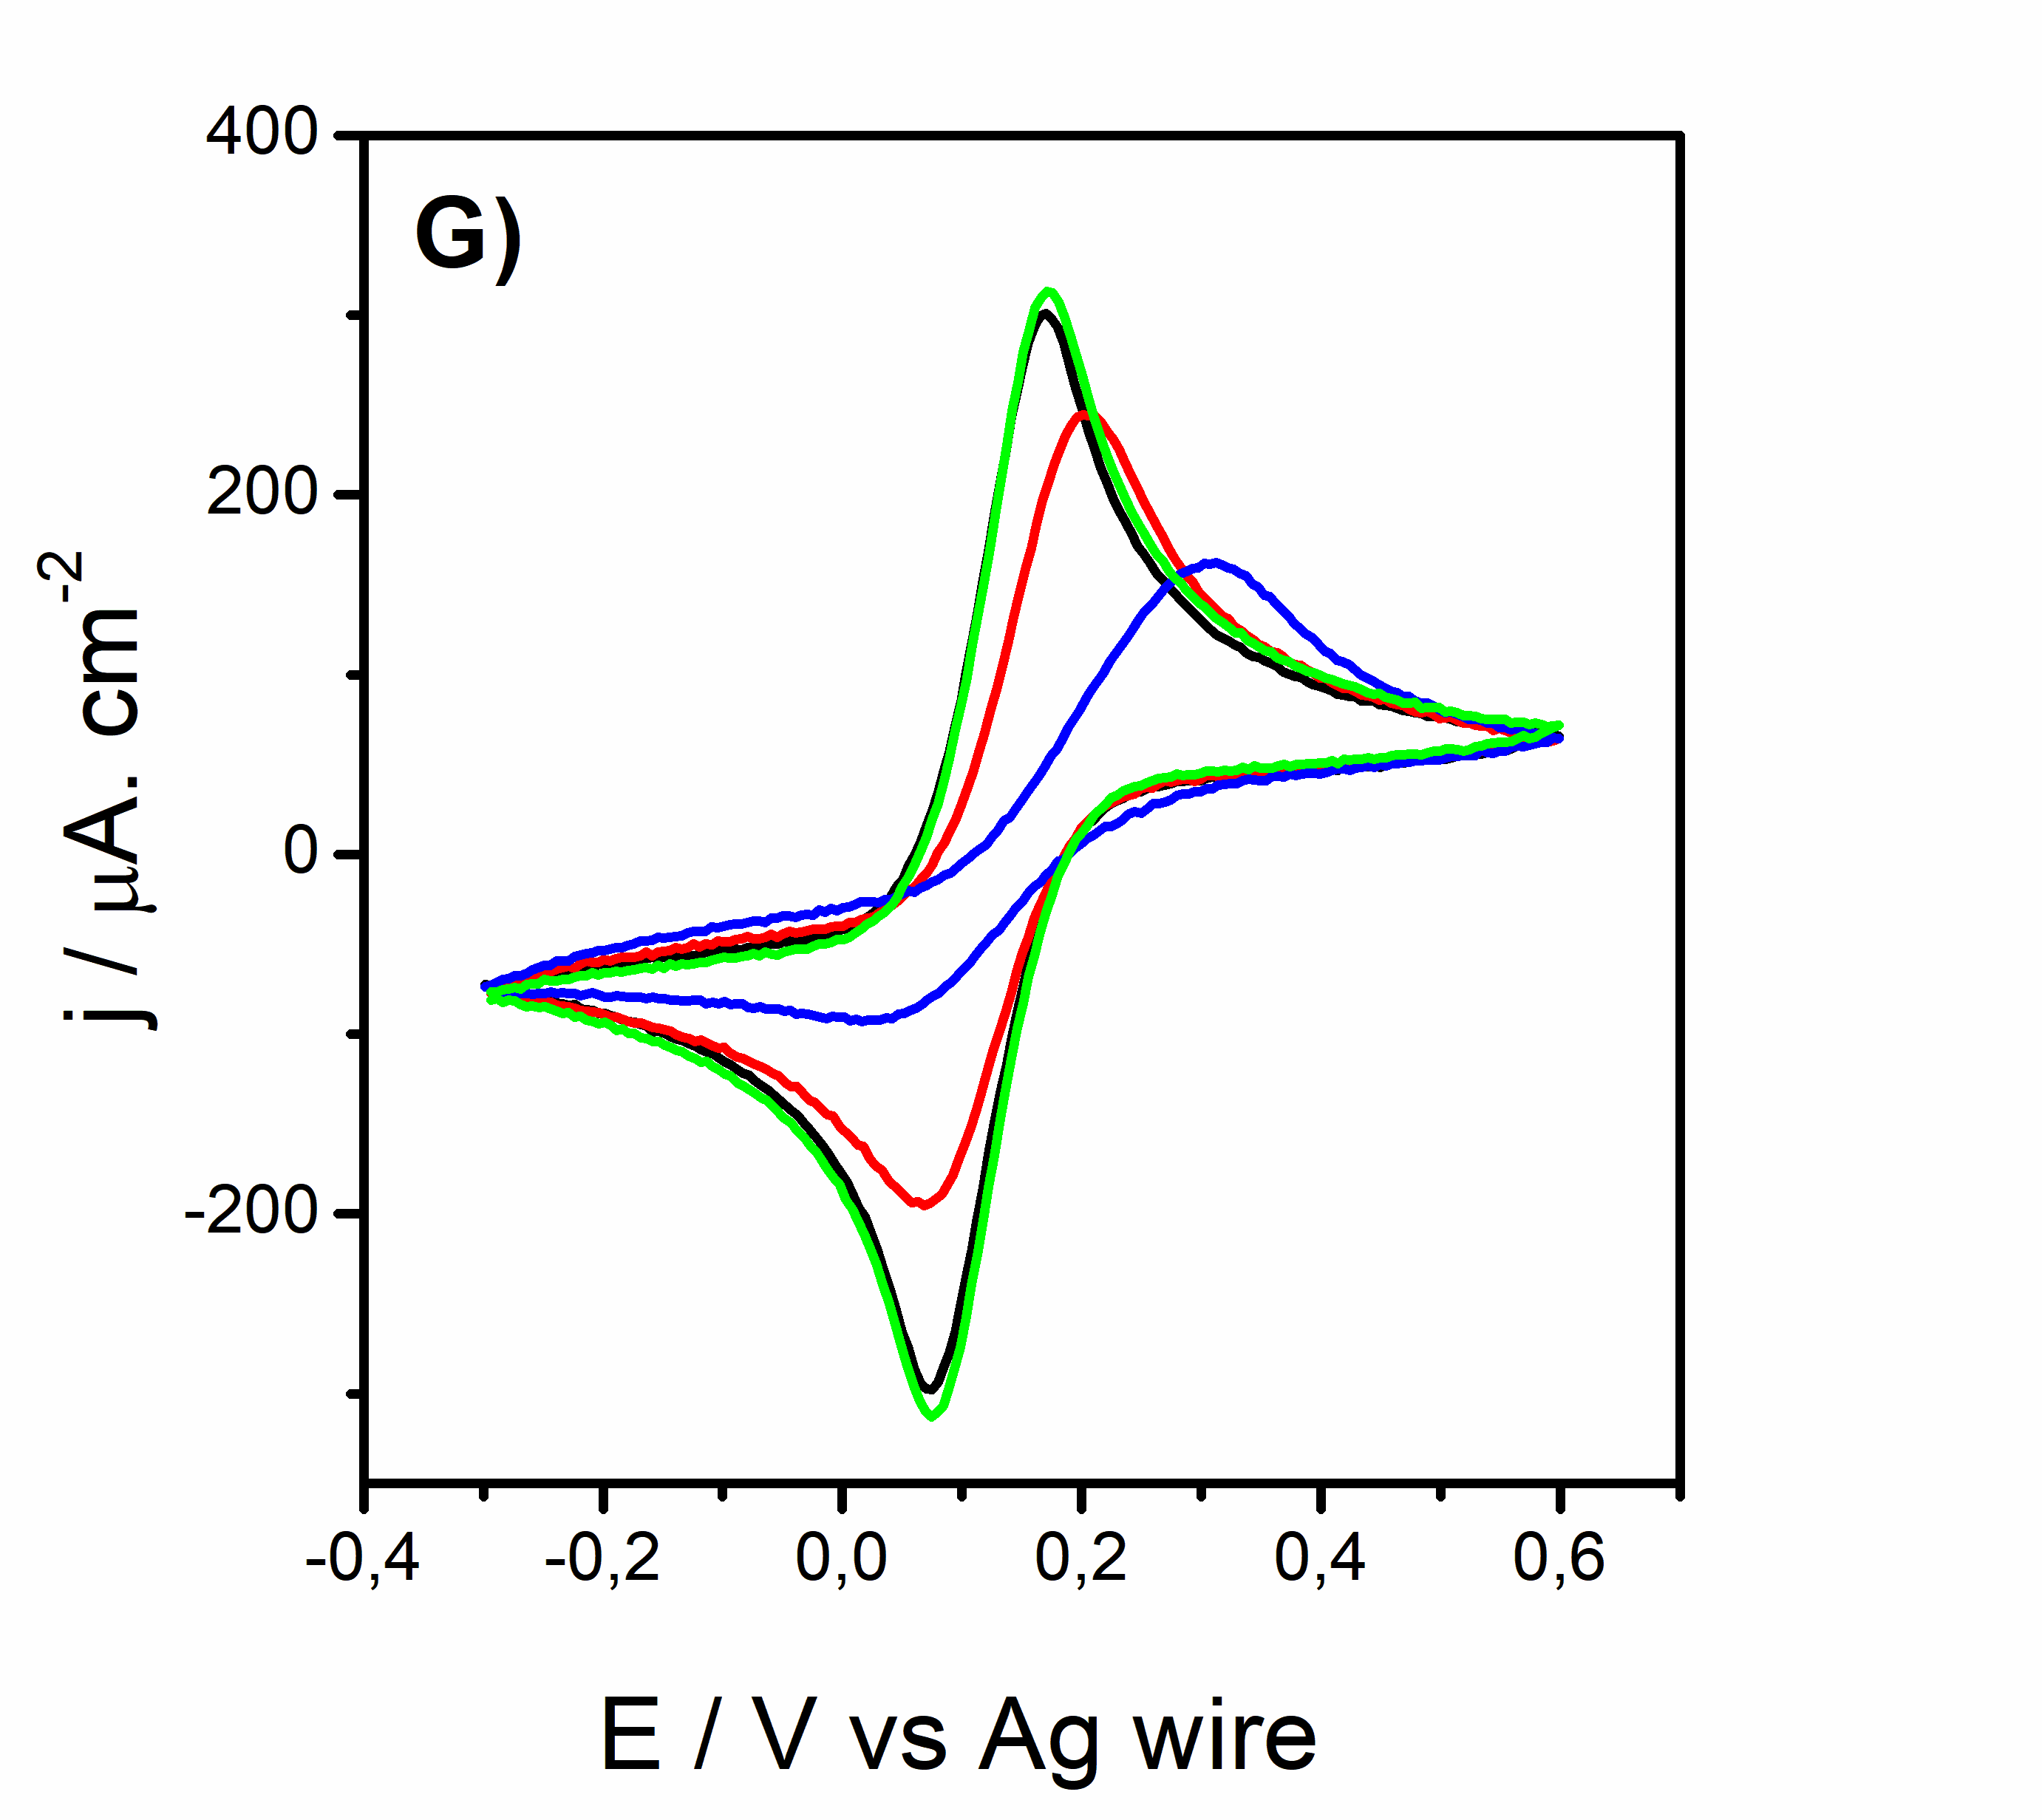

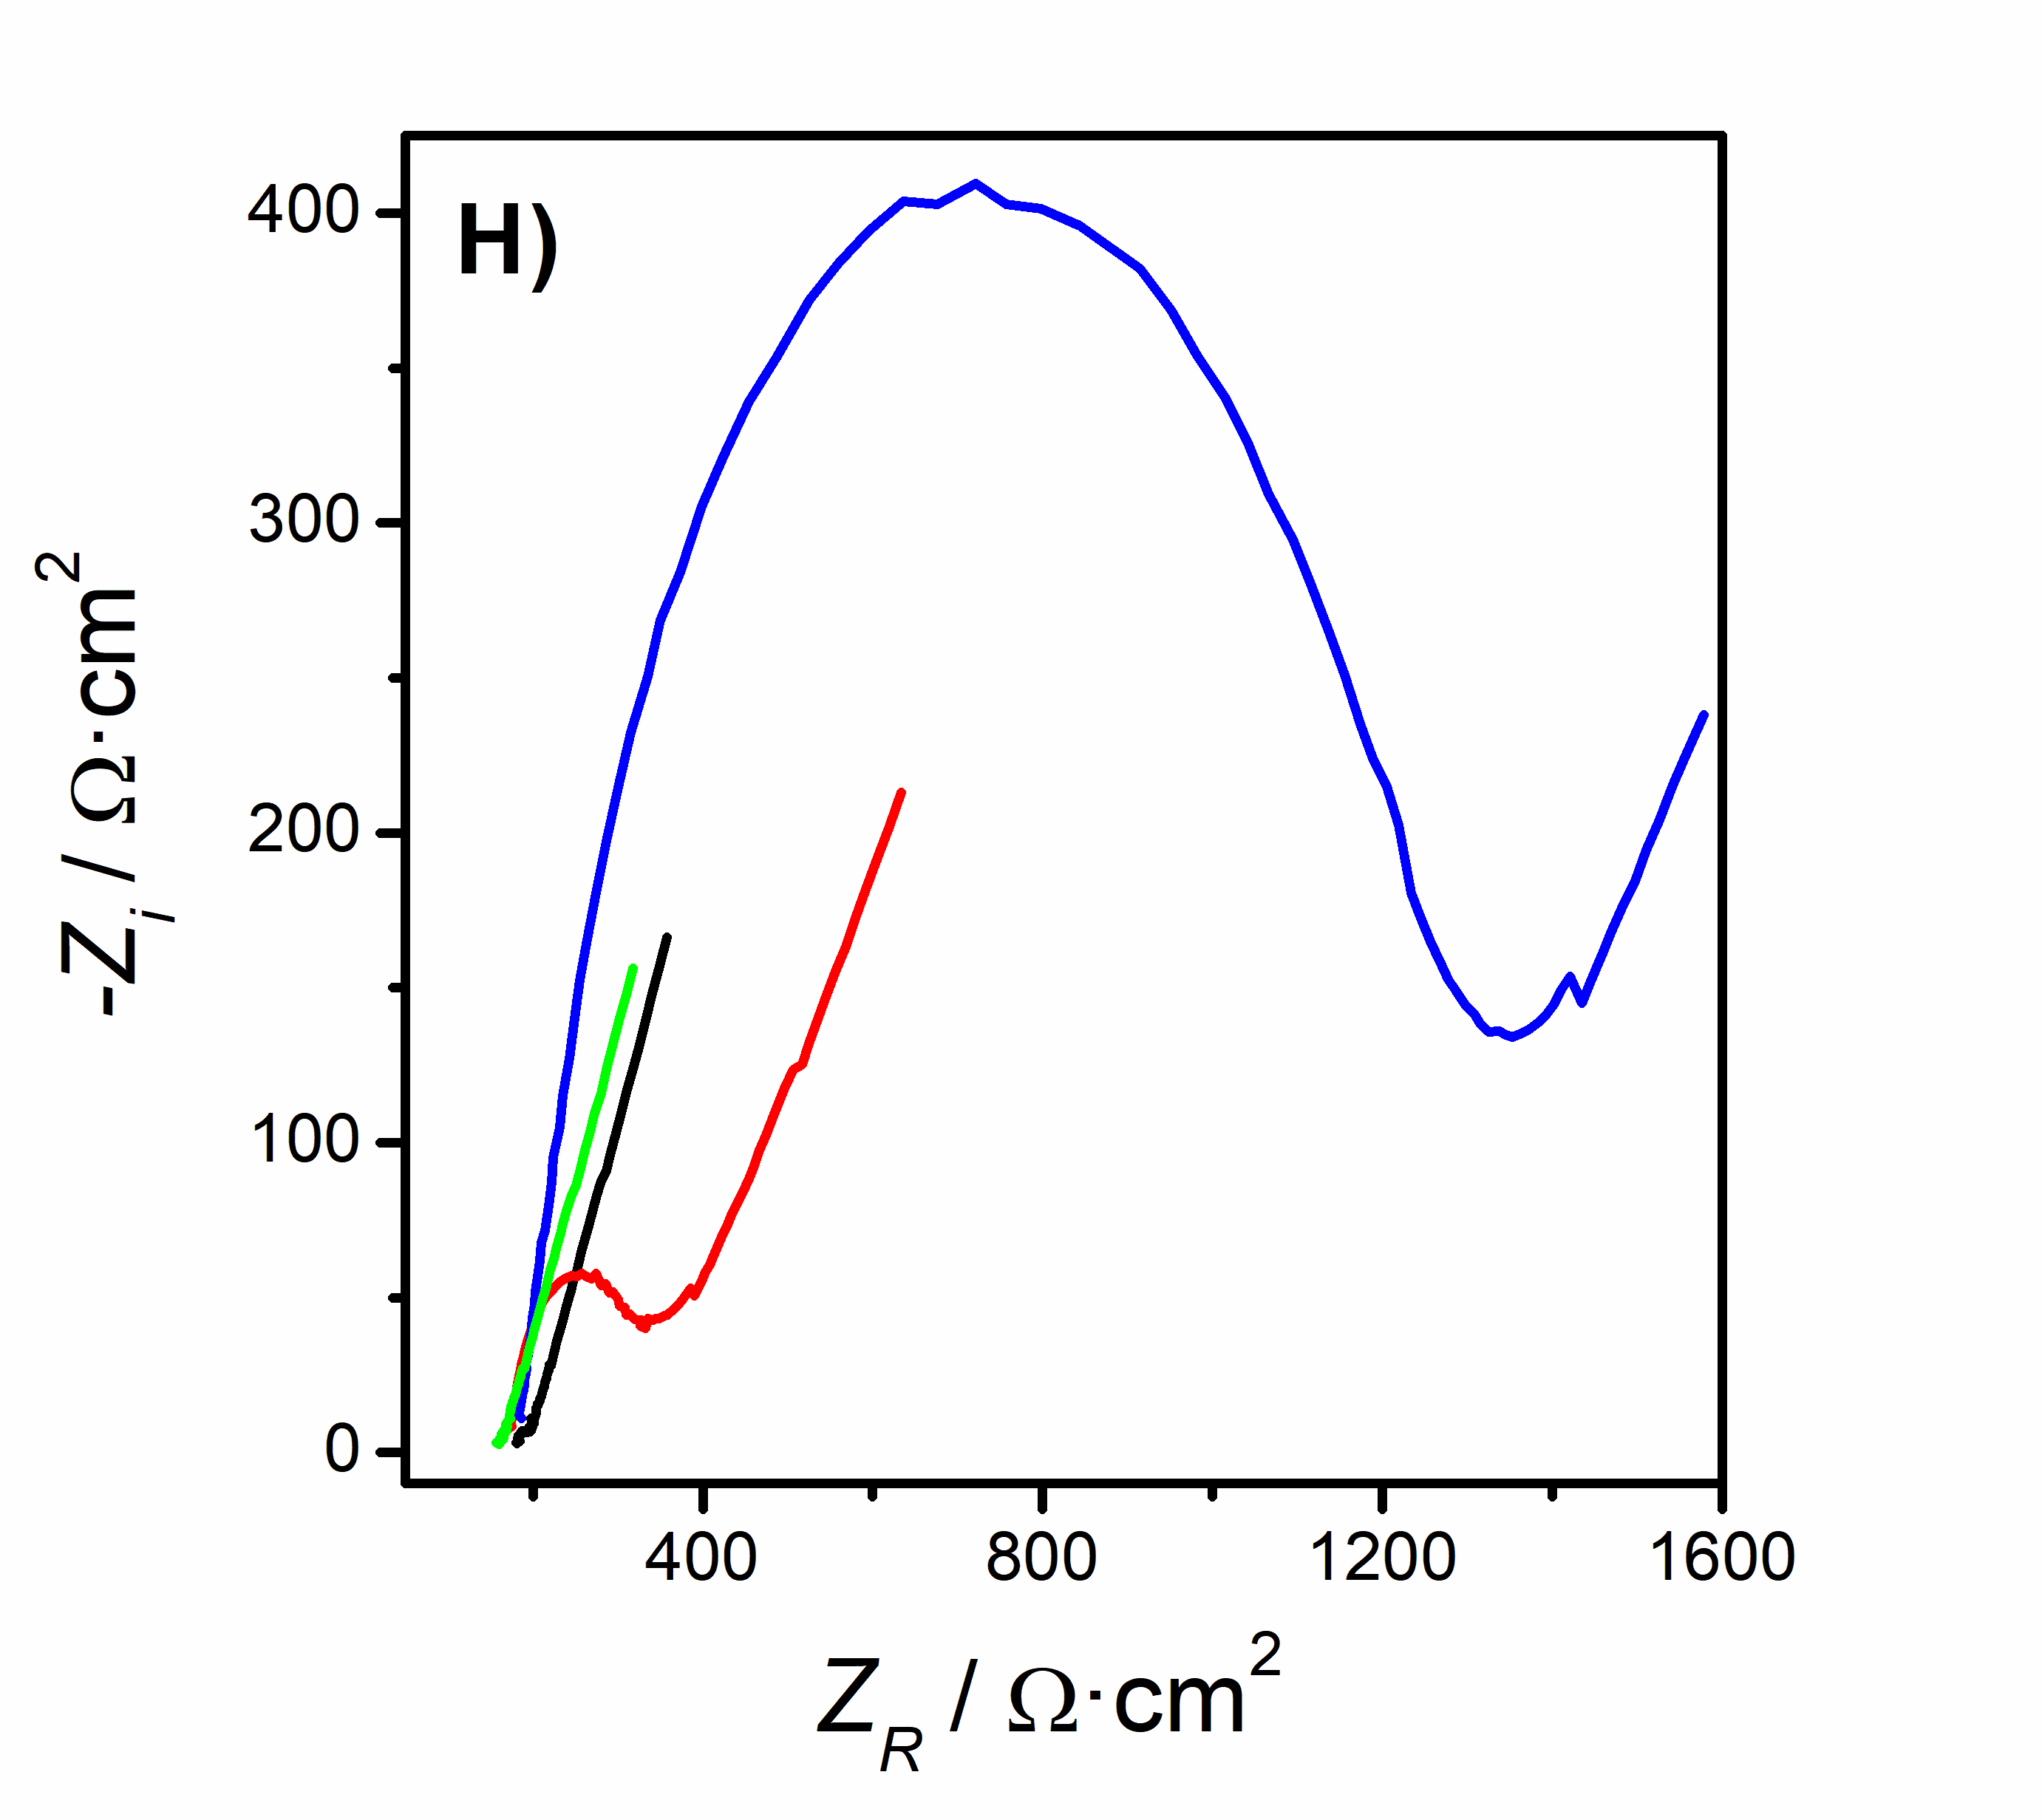


**Figure S1** - *CVs (****A****,* ***C****,* ***E****,* ***G****) and Nyquist plots (****B****,* ***D****,* ***F****,* ***H****) acquired for the bare Au (black), Au/AUT (red), Au/AUT/P100 (blue), and Au/P100 electrodes (green) in electrolytes FE7 (****A*** *&* ***B****), FE6 (****C*** *&* ***D****), FE5 (****E*** *&* ***F****), and FE4 (****G*** *&* ***H****). The scan rate and oscillating amplitude for the CVs and impedance spectra were 0.05 V·s-1 and 0.01 V, respectively.*

**
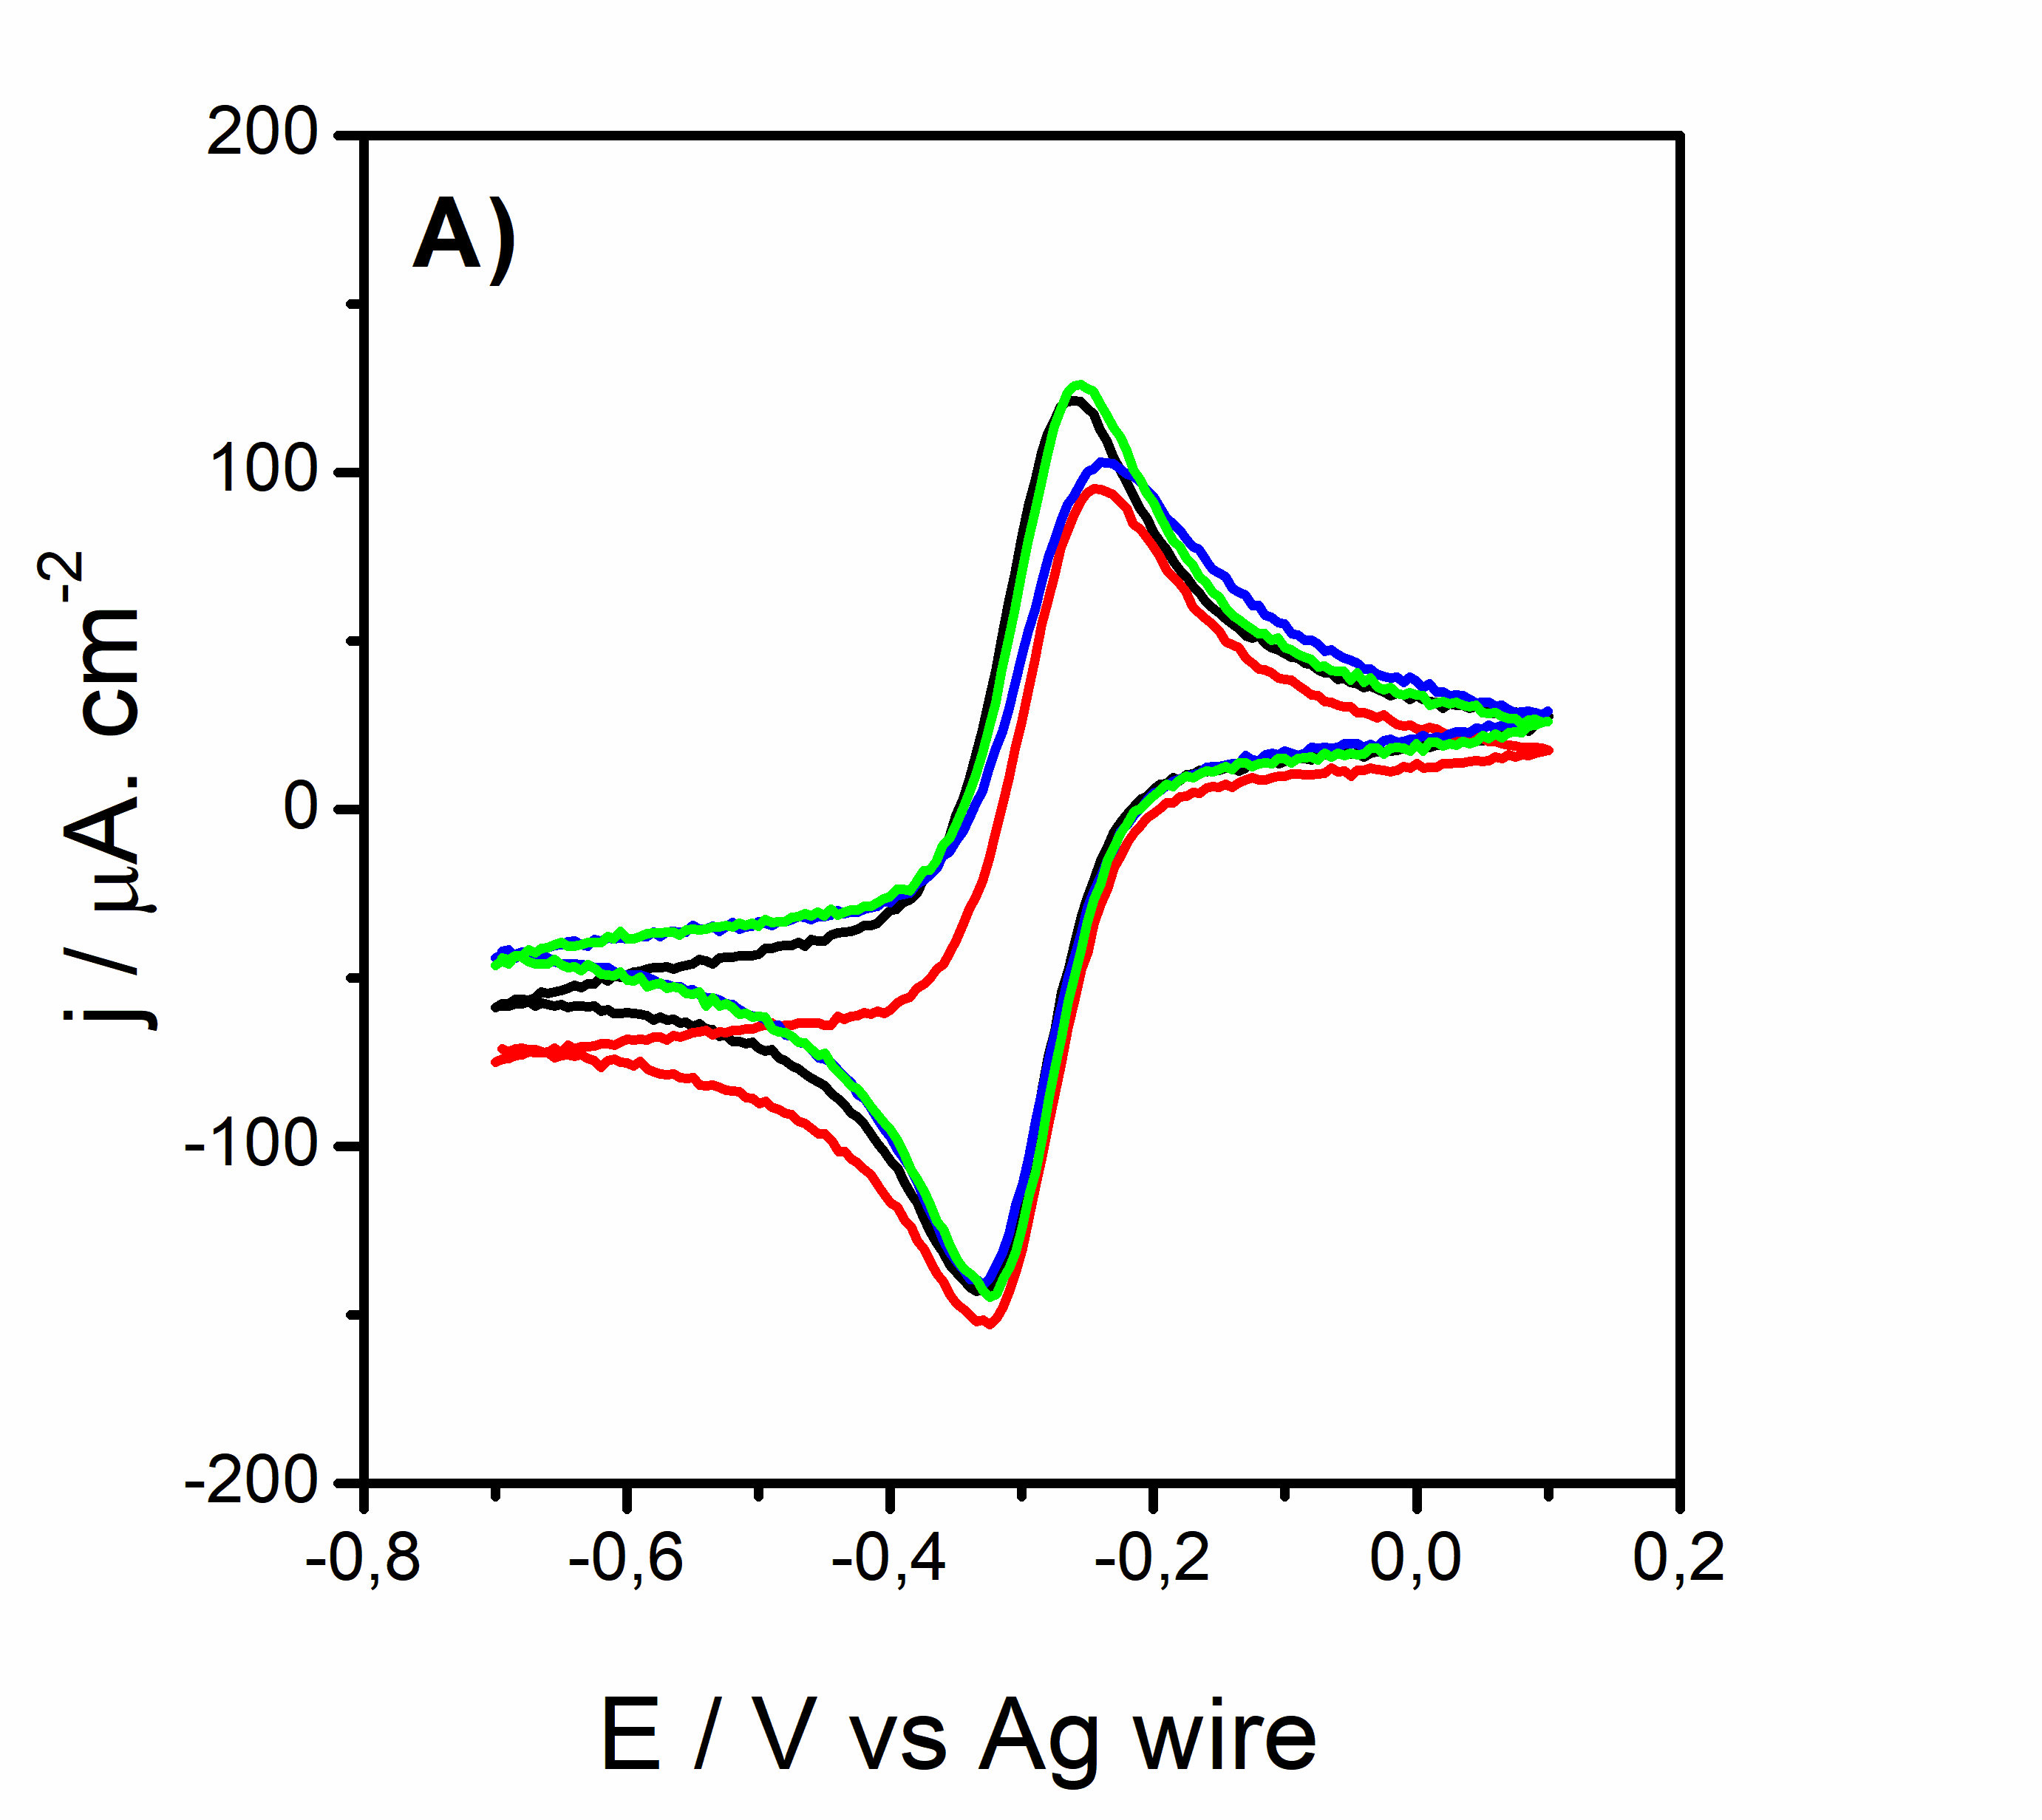

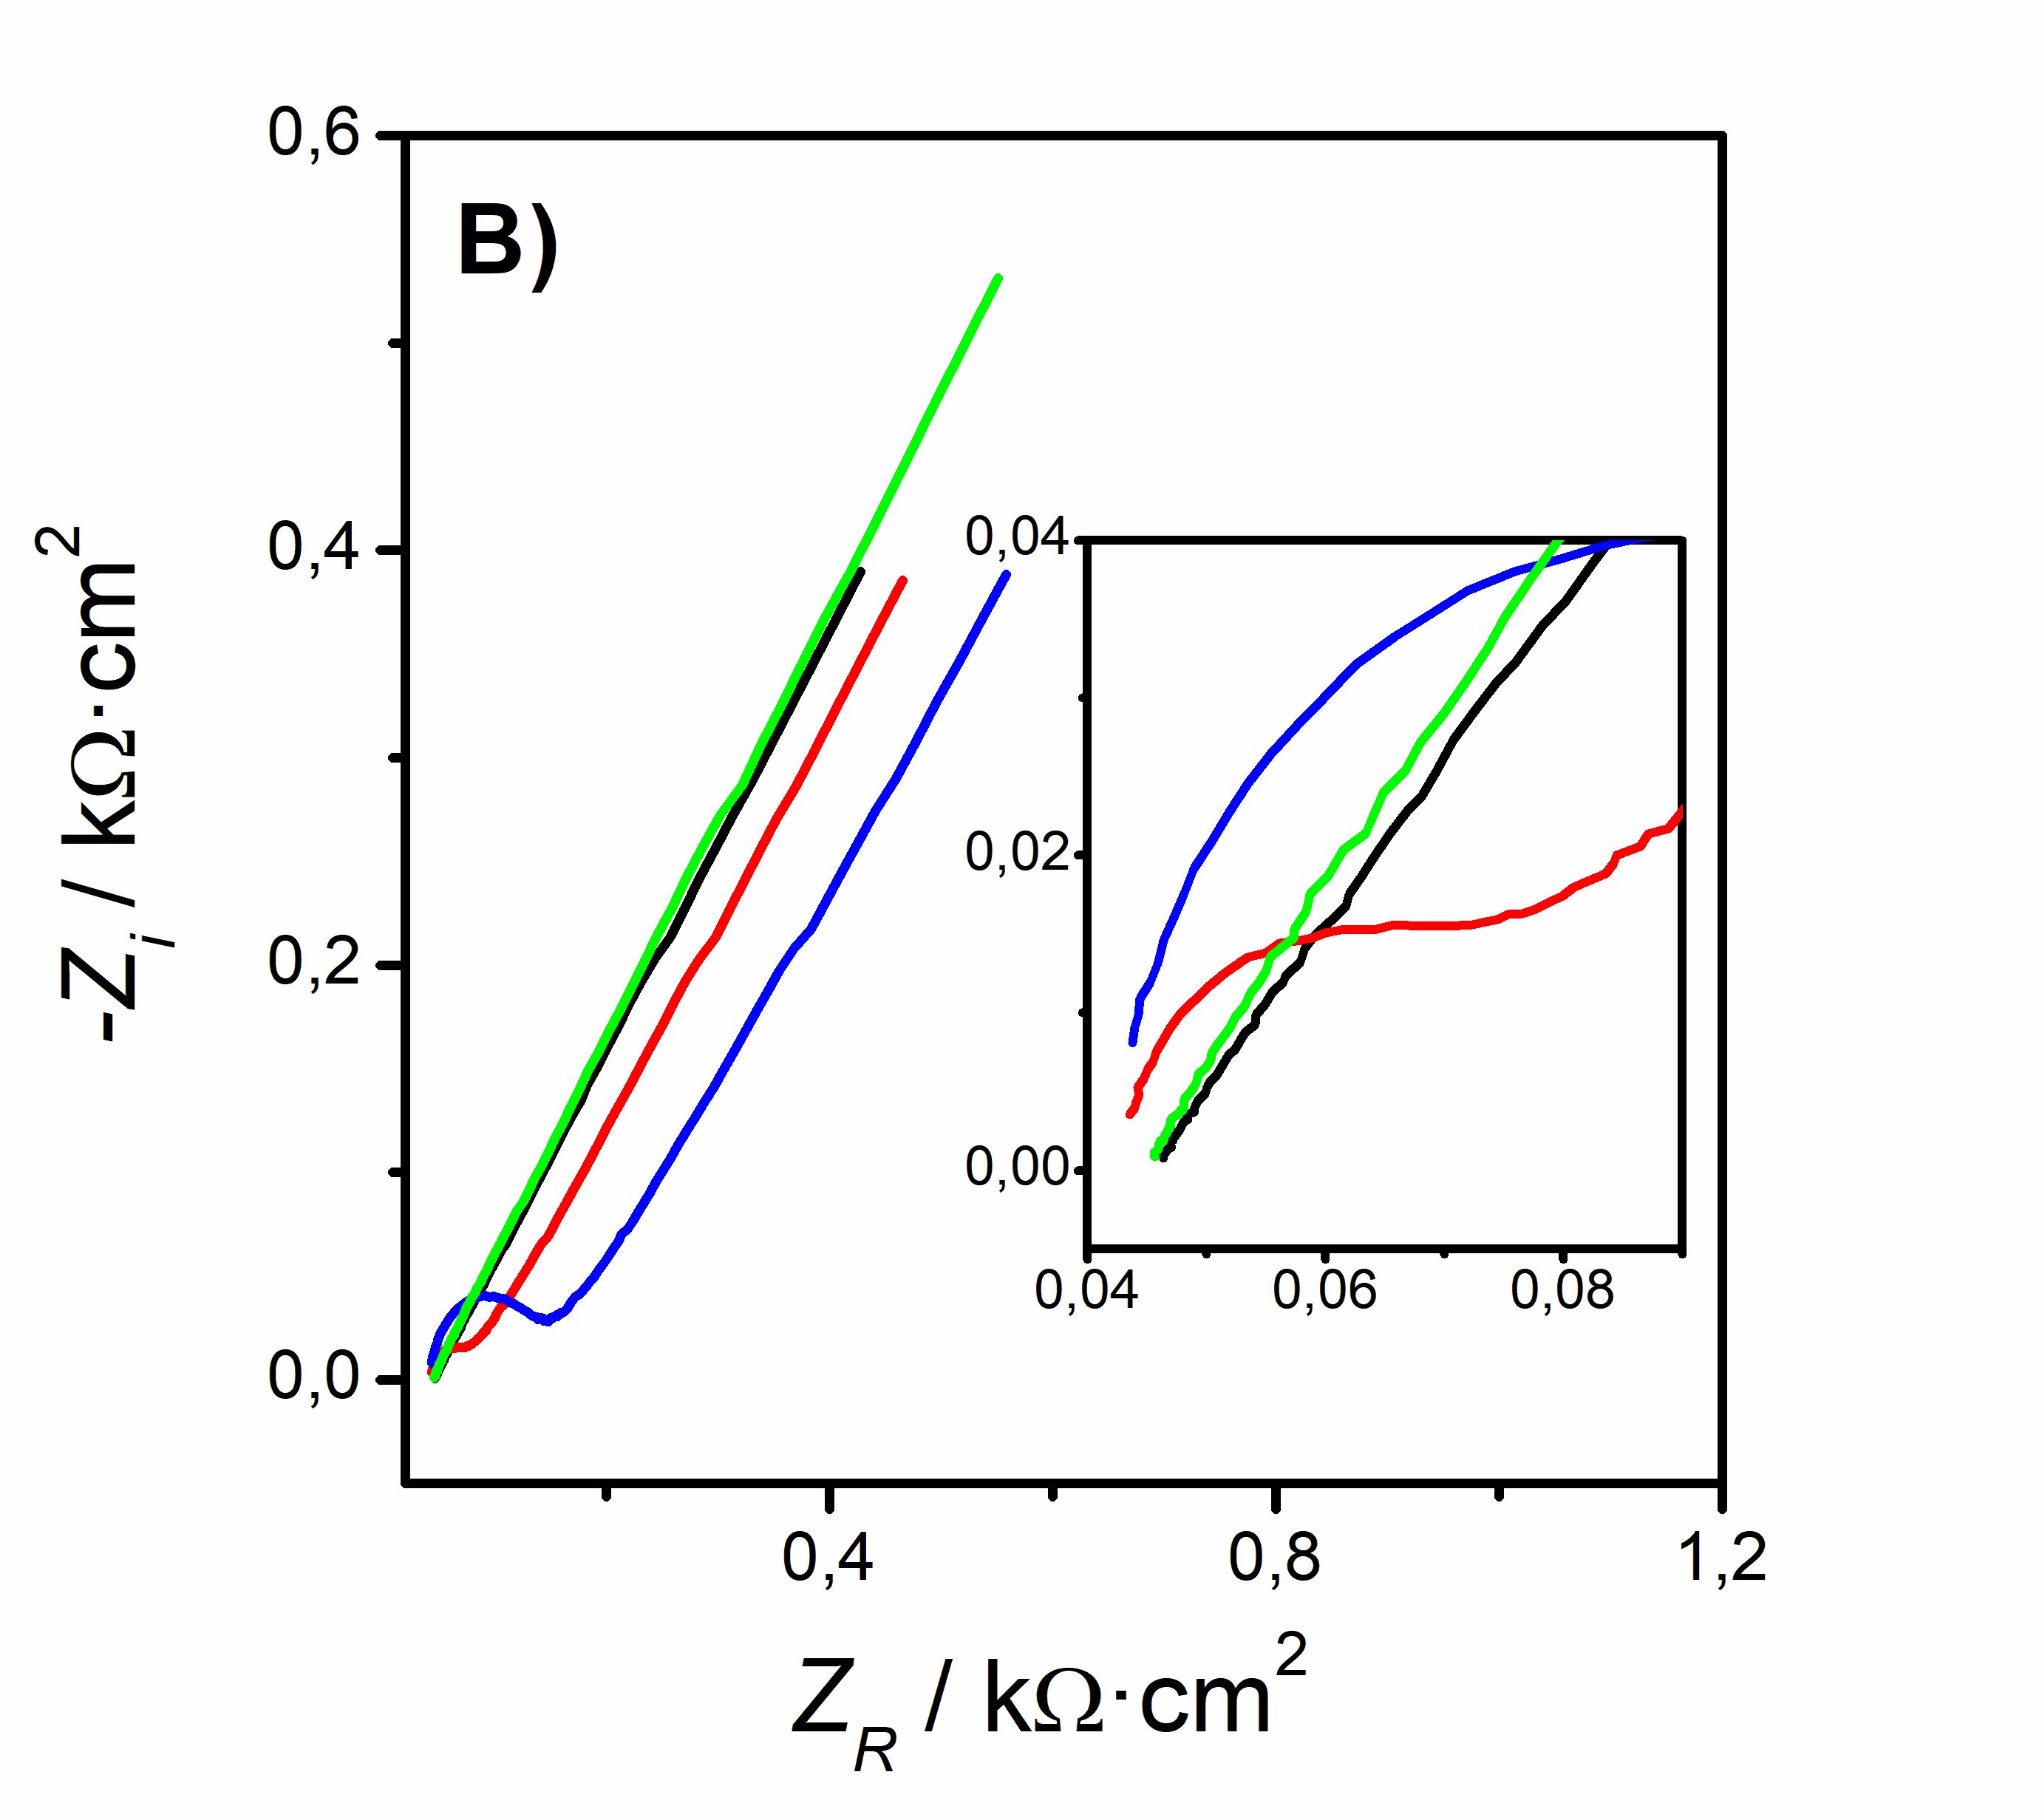
**

**
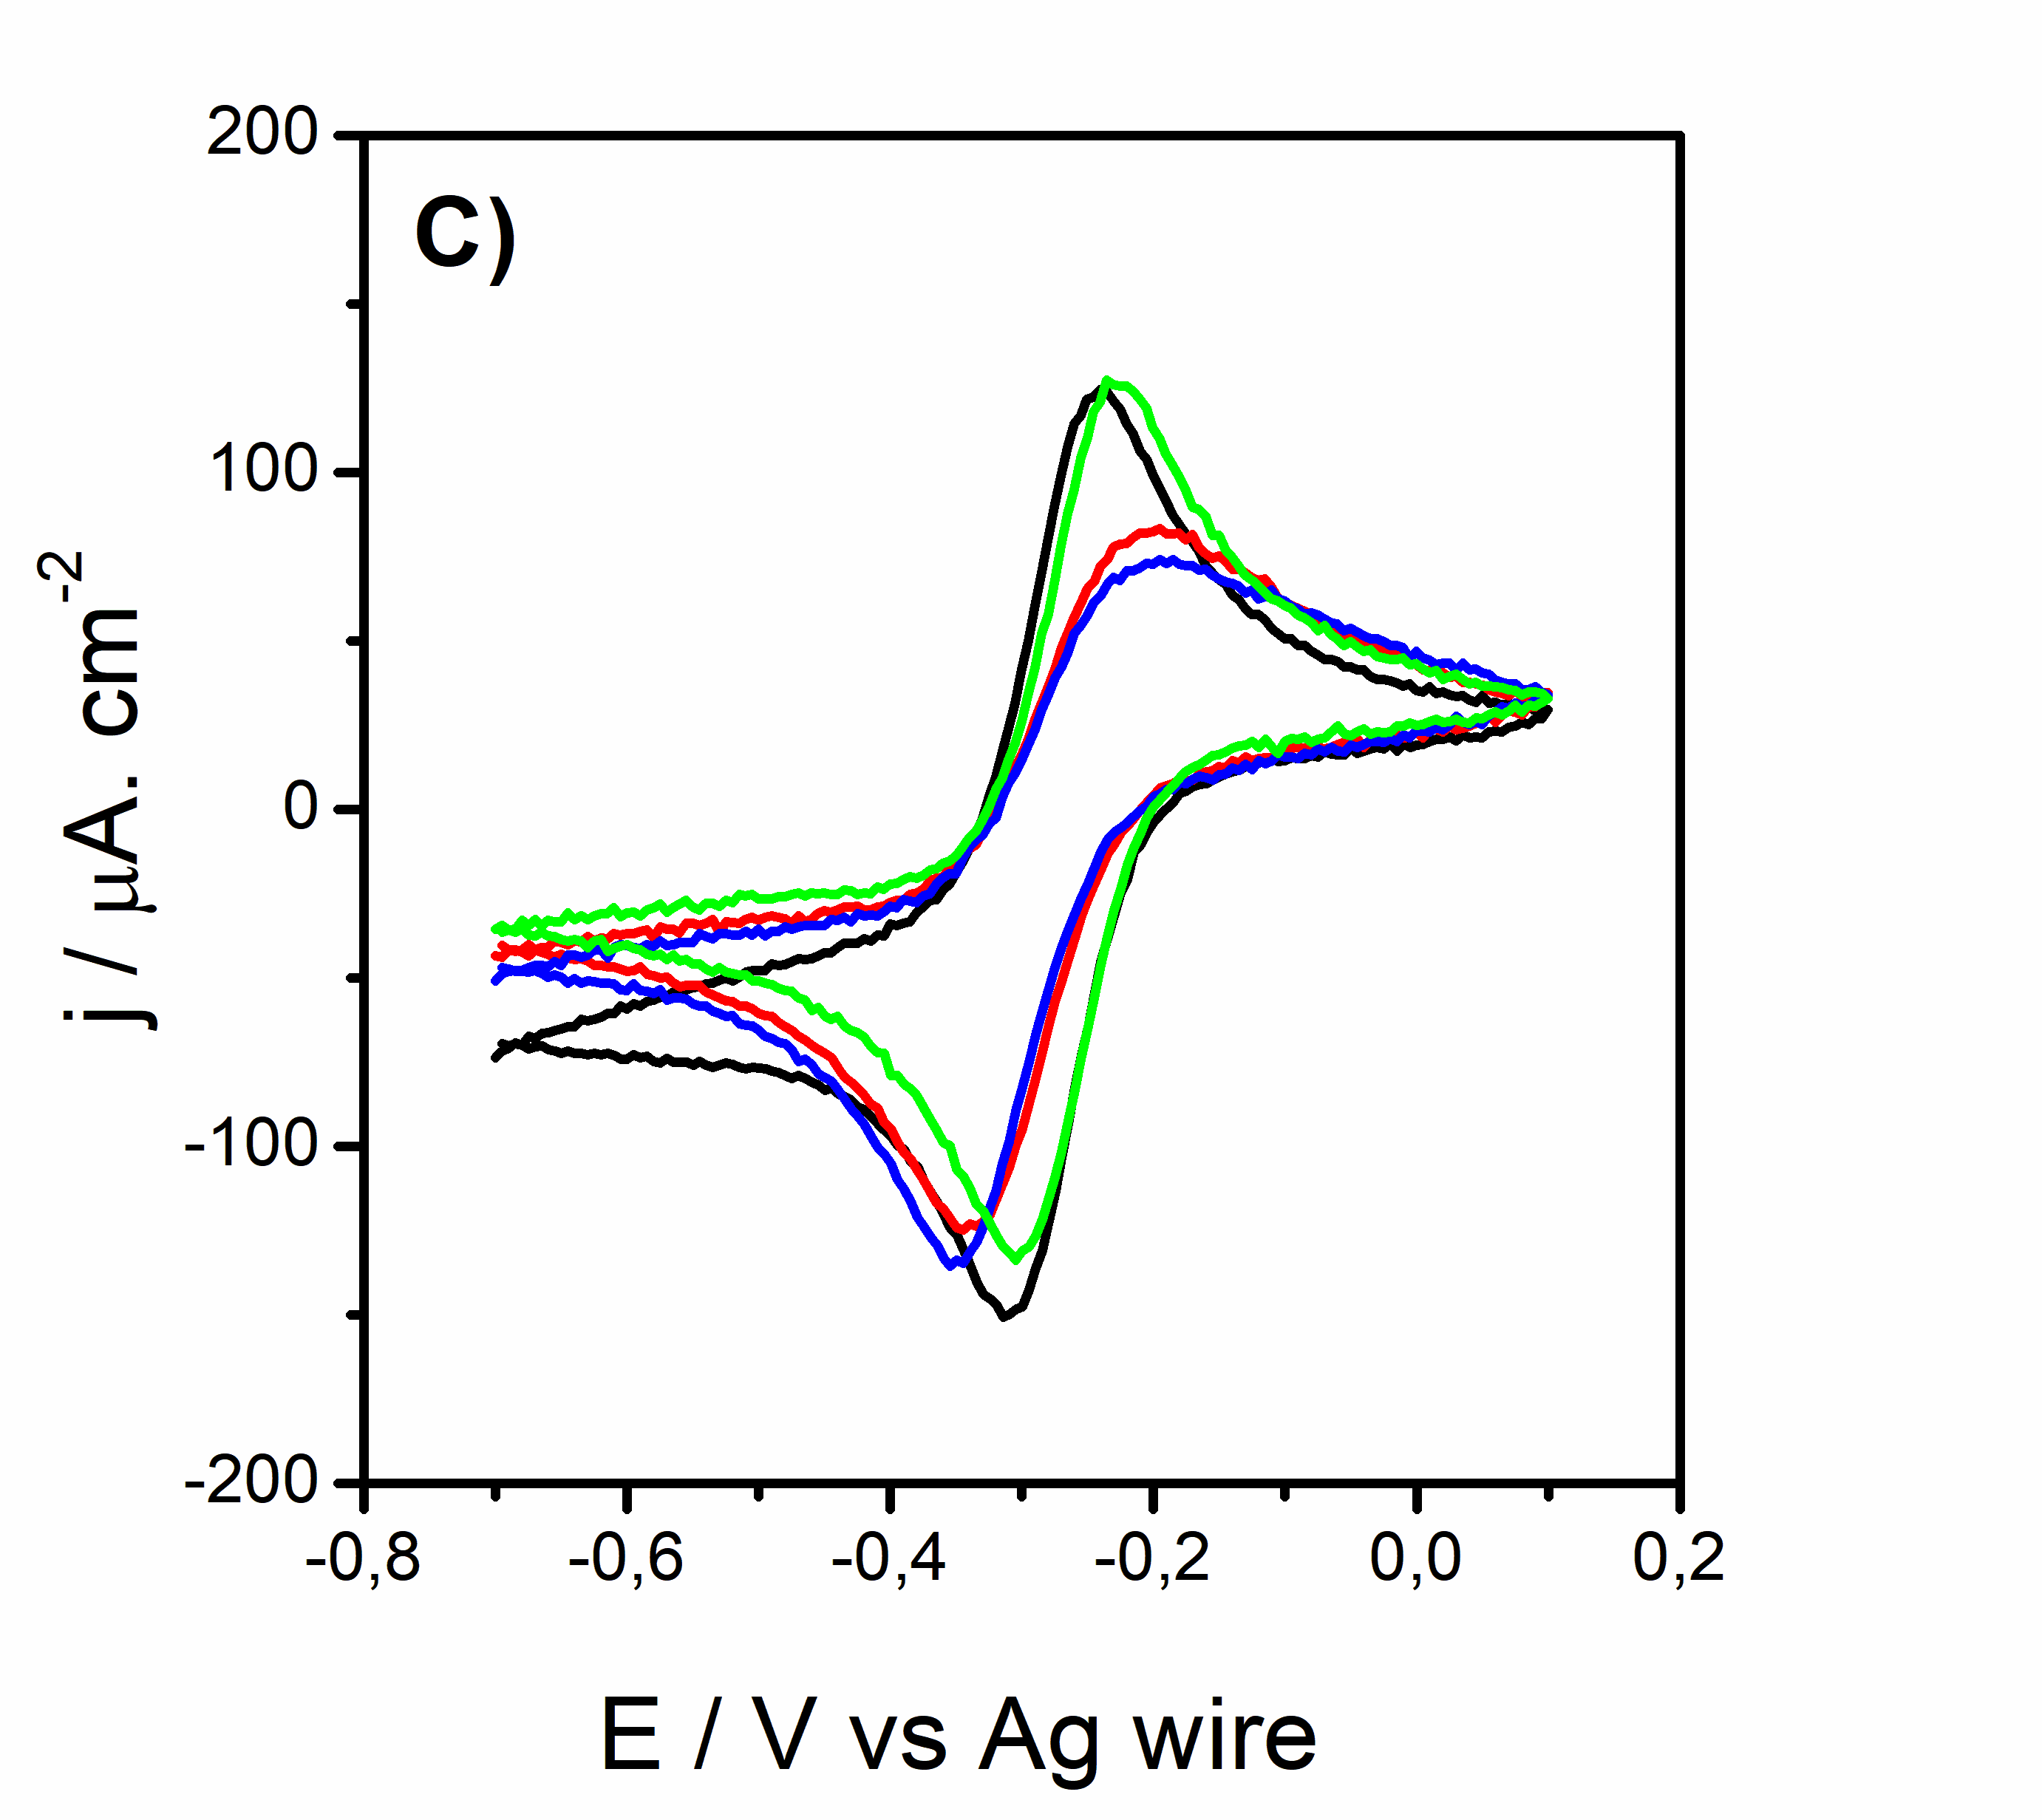

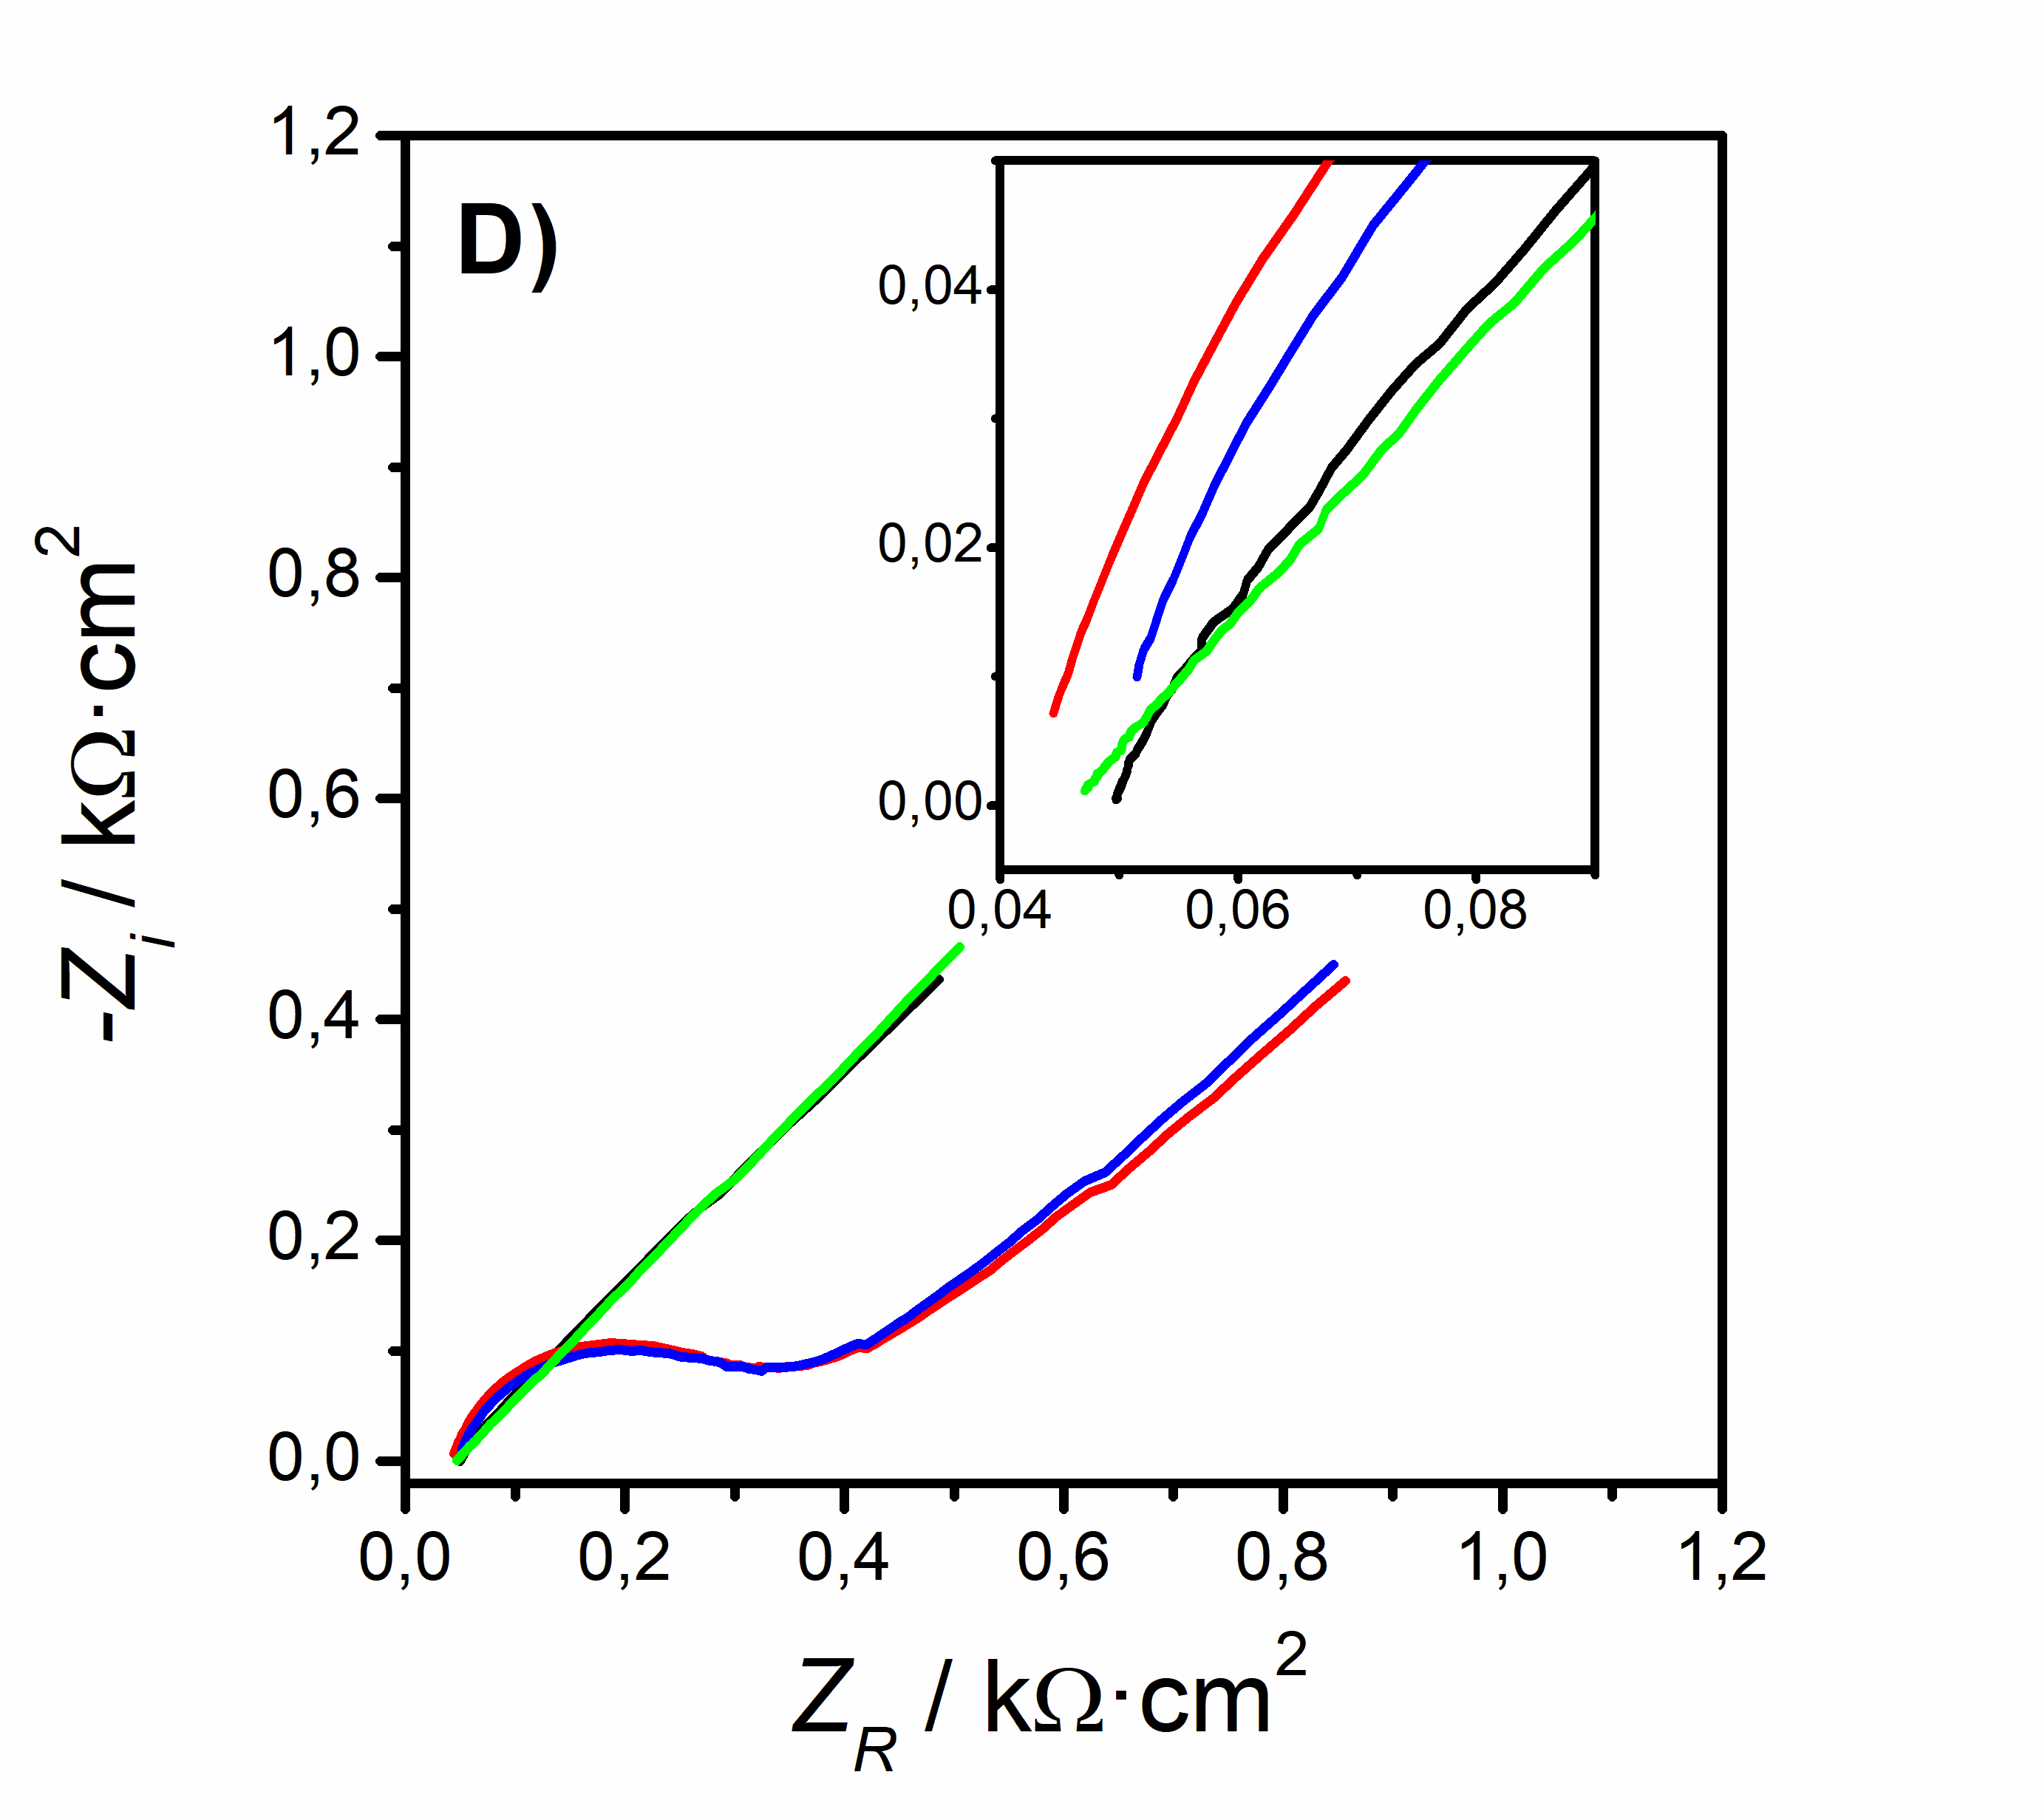
**

**
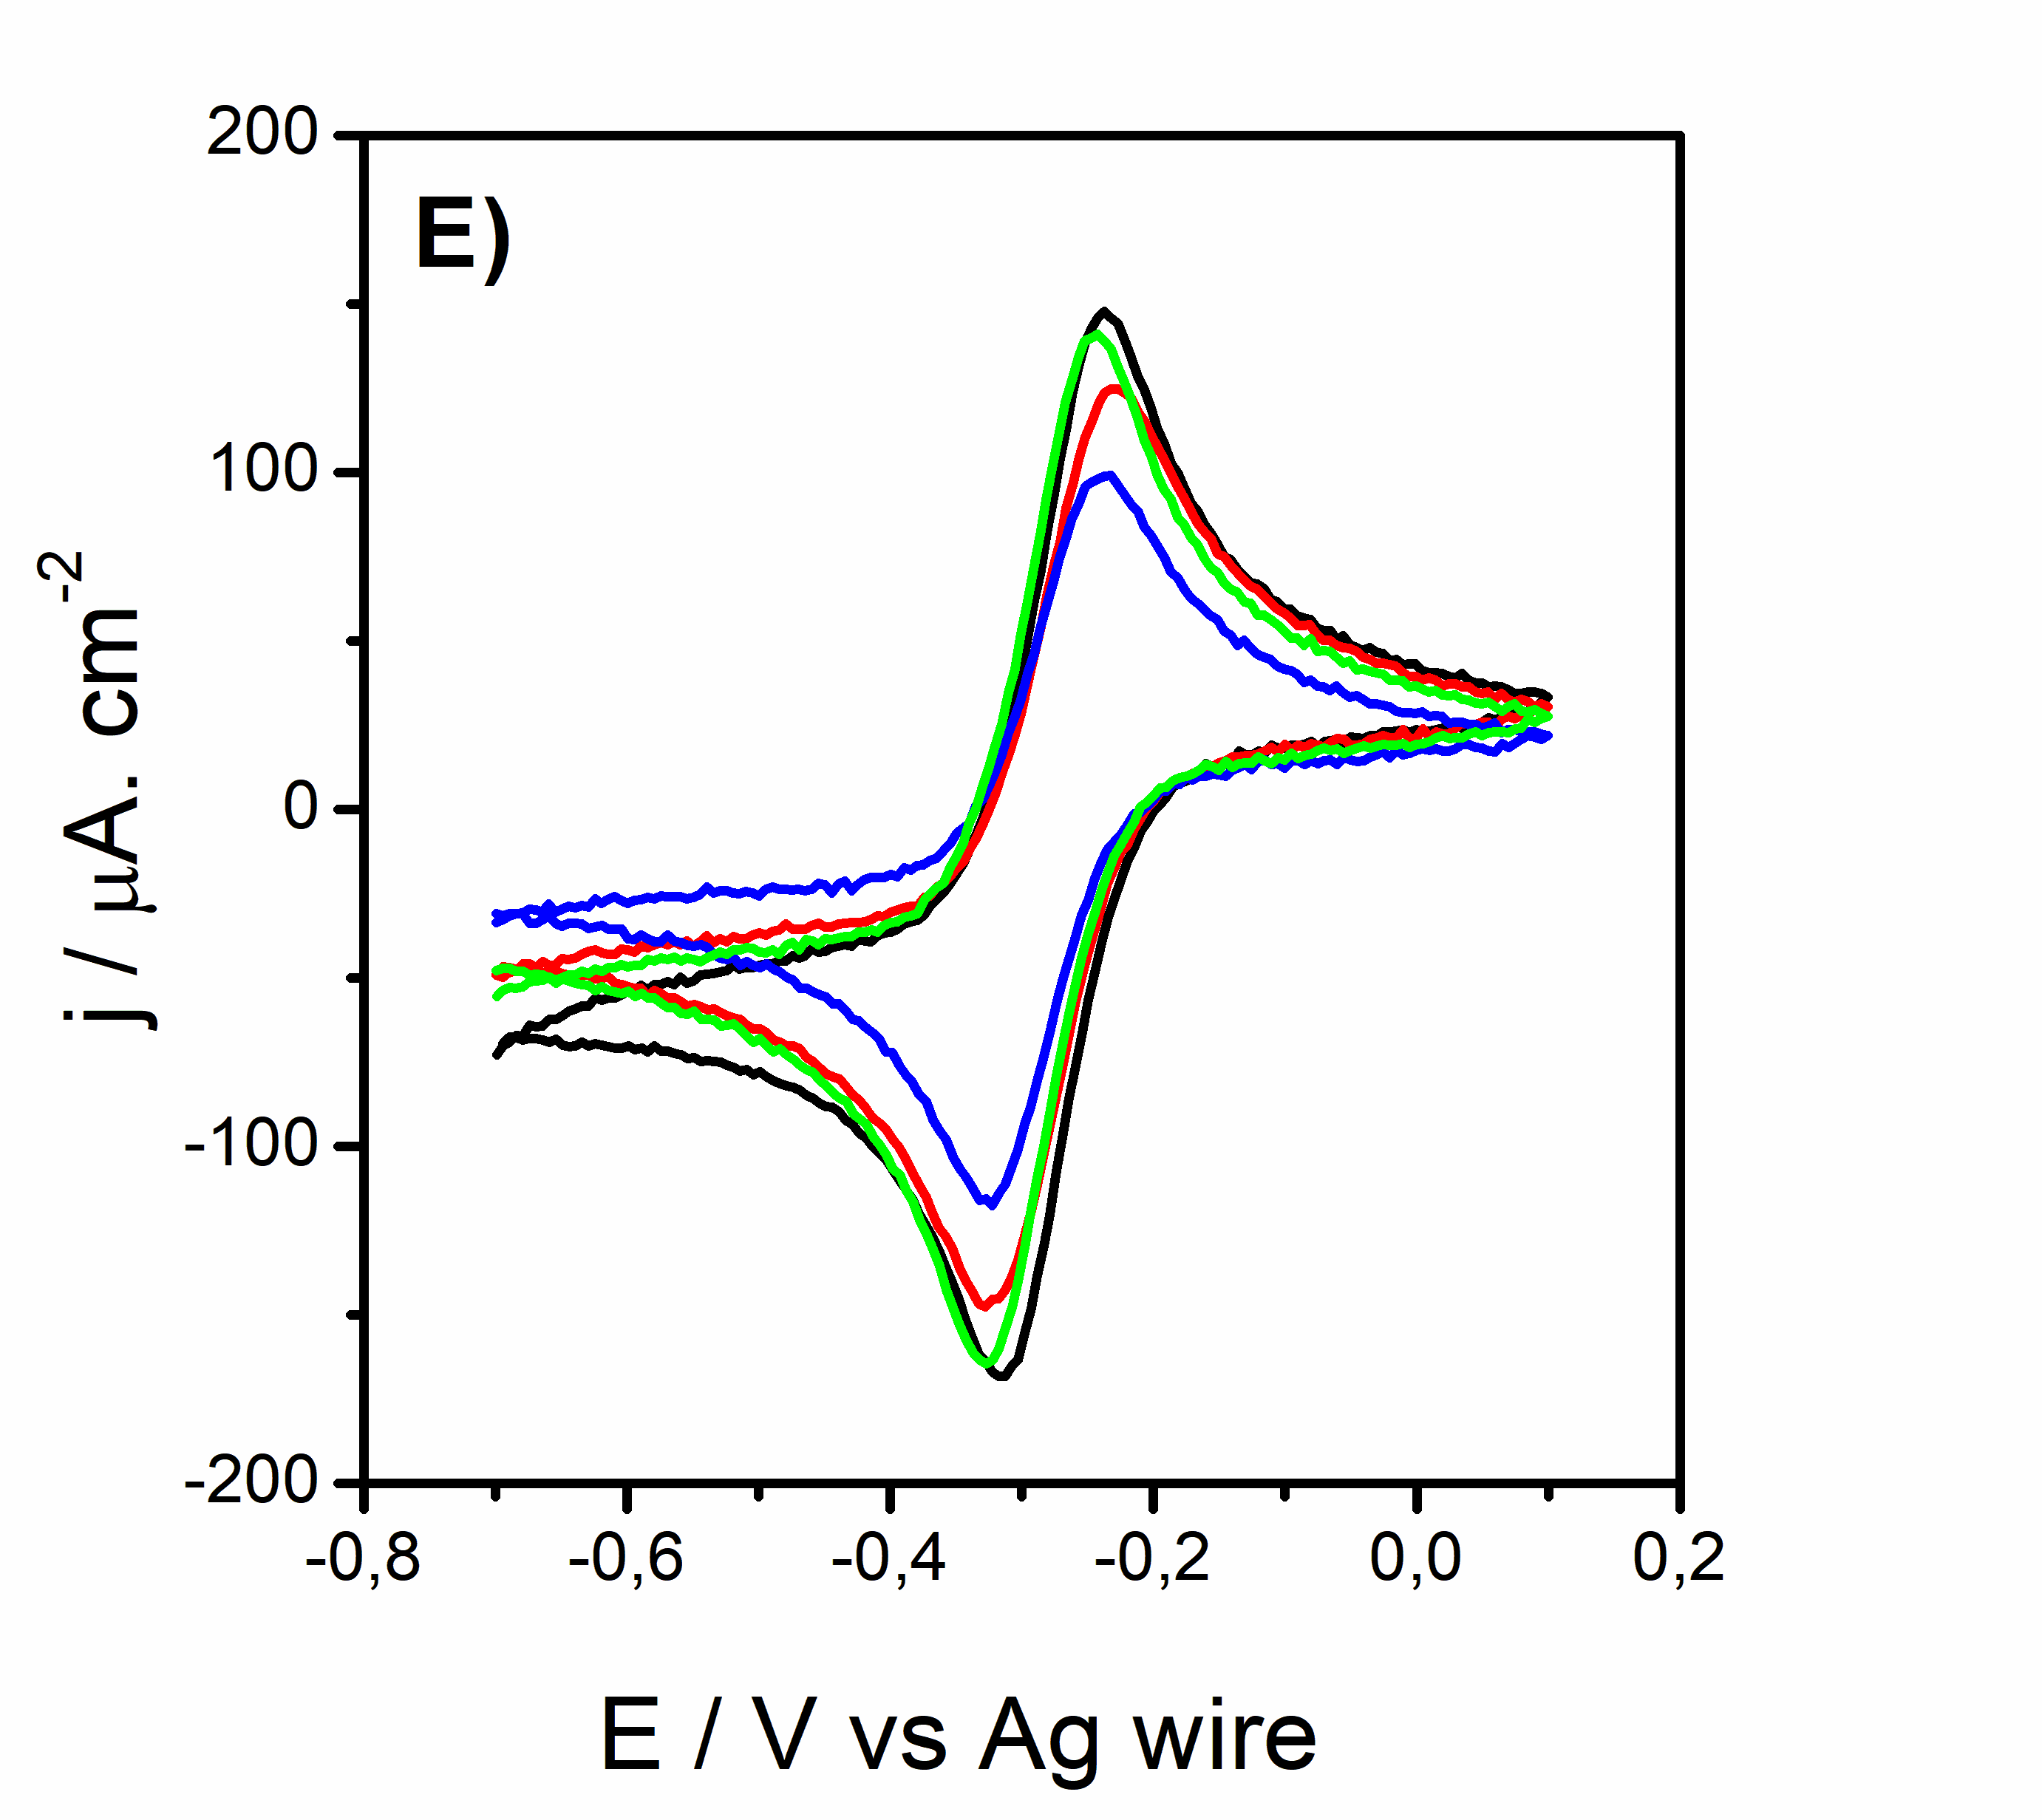

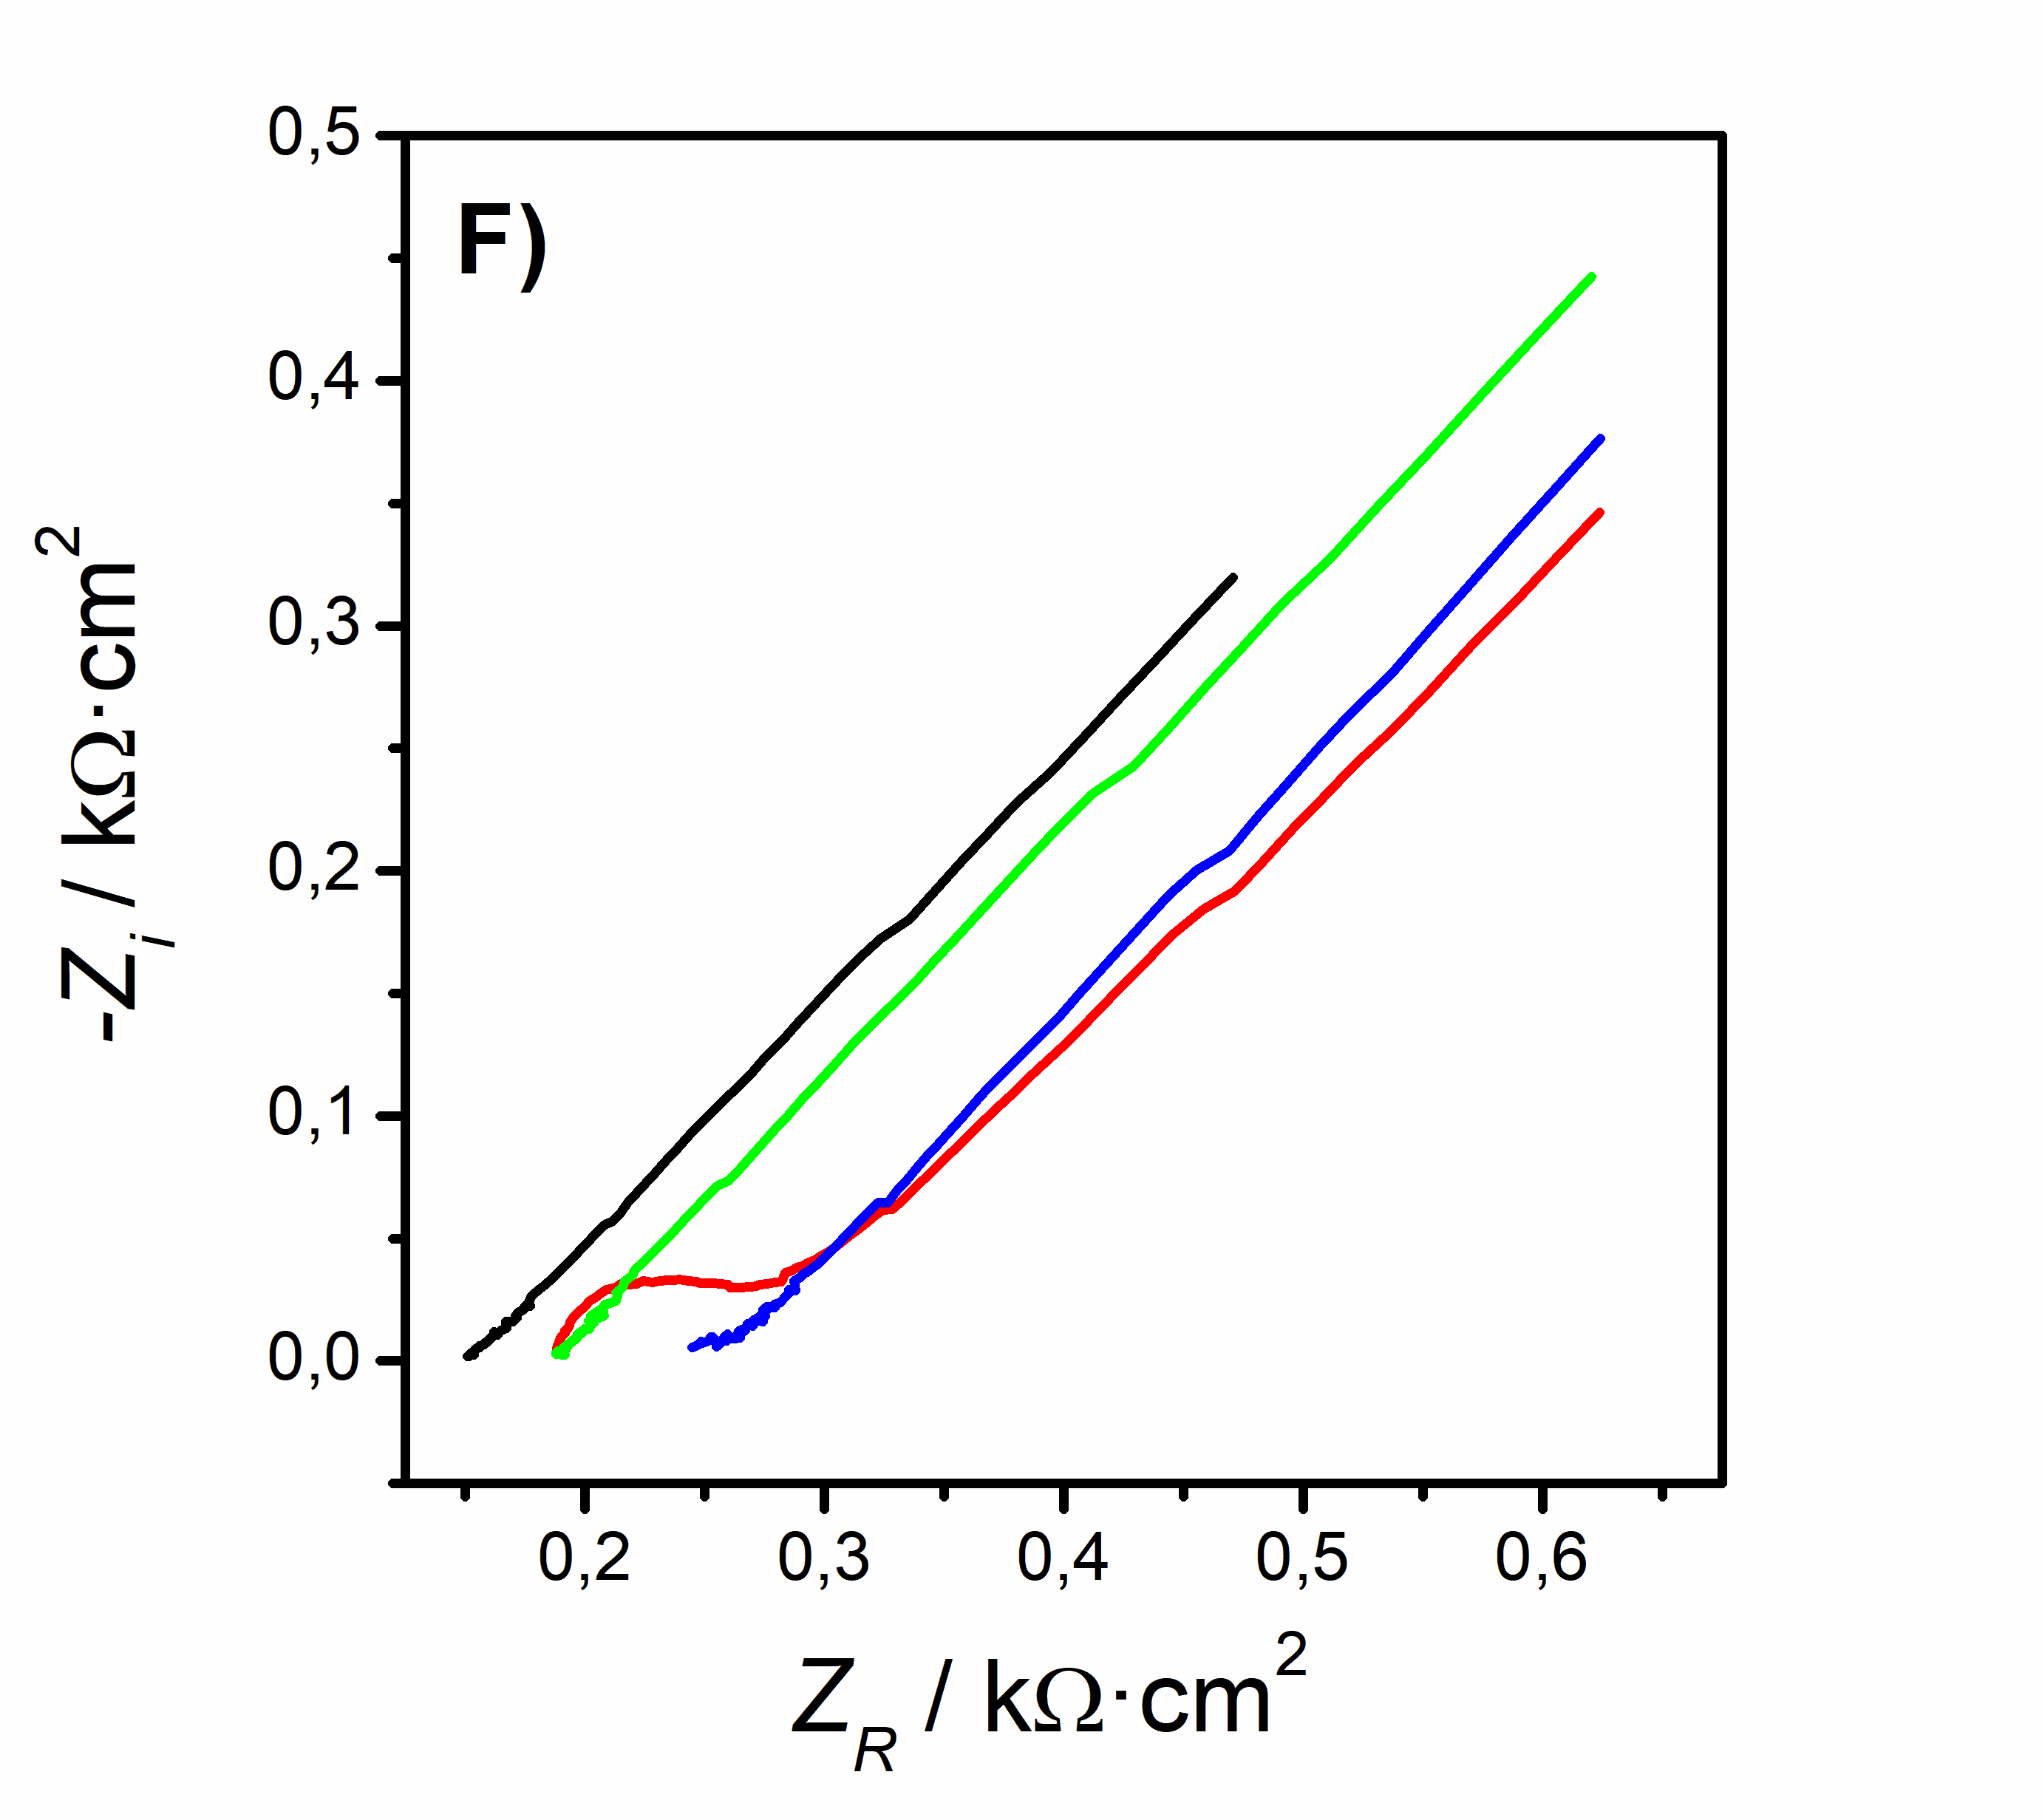
**

**
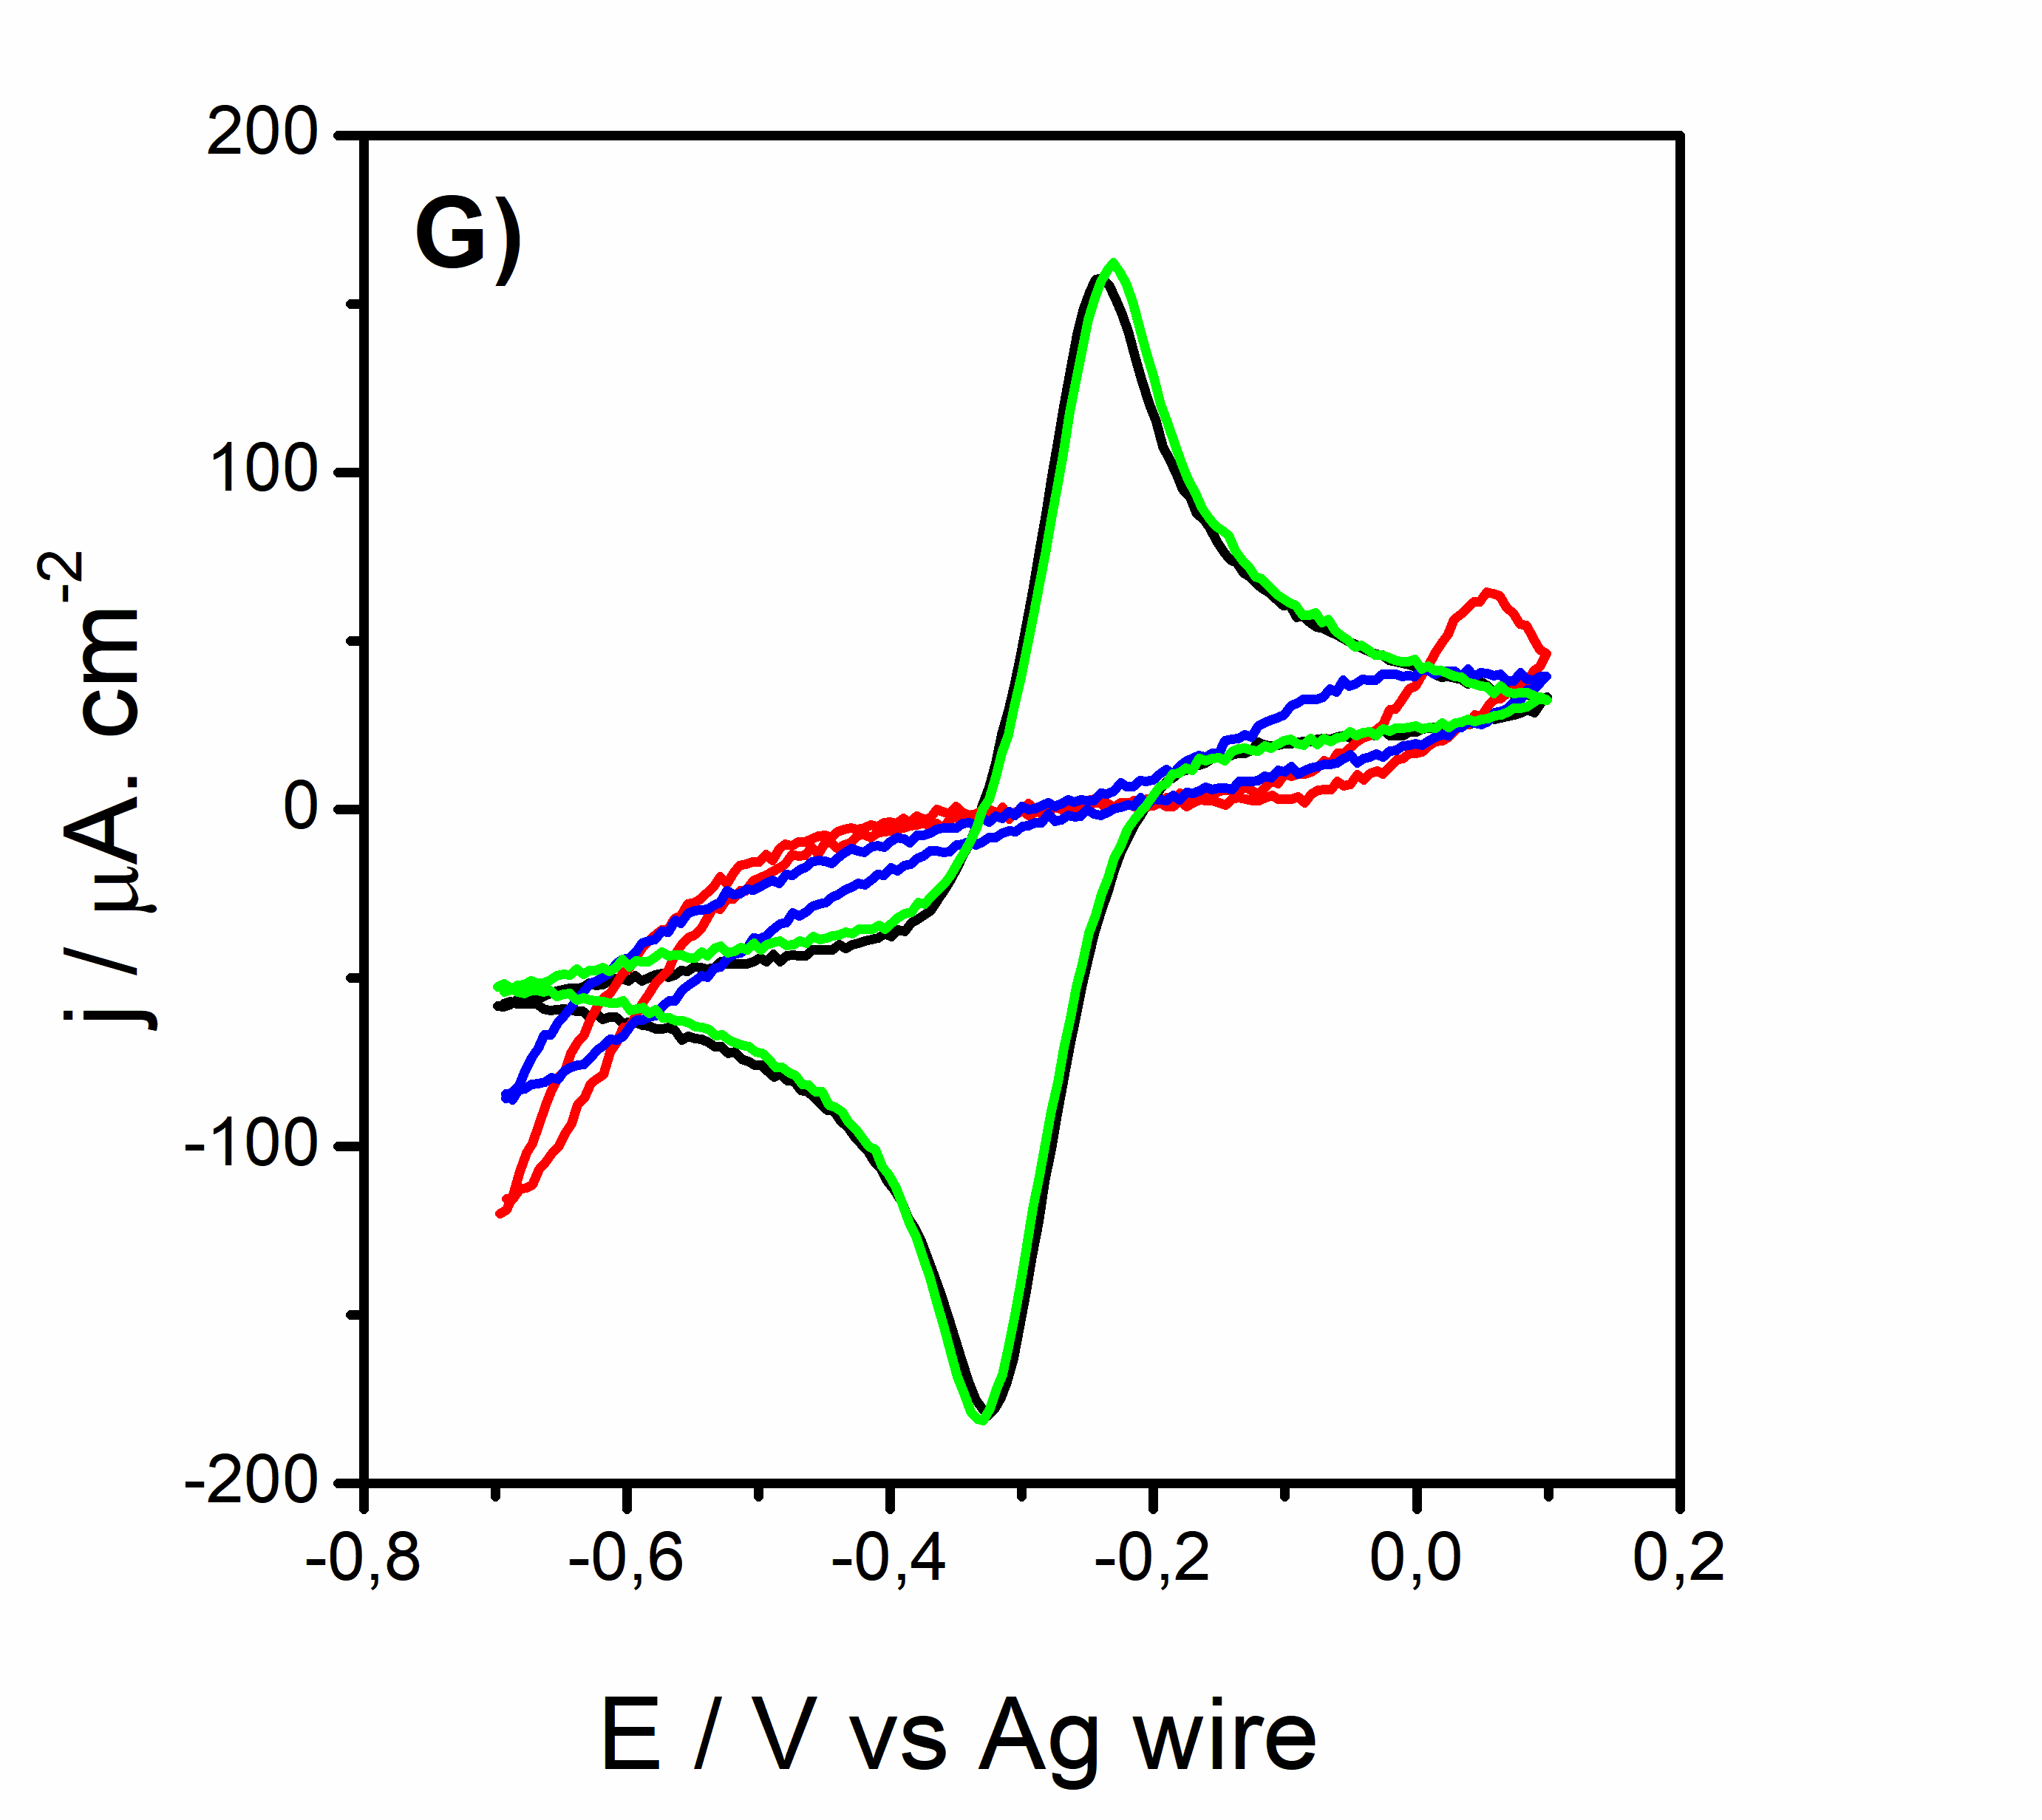

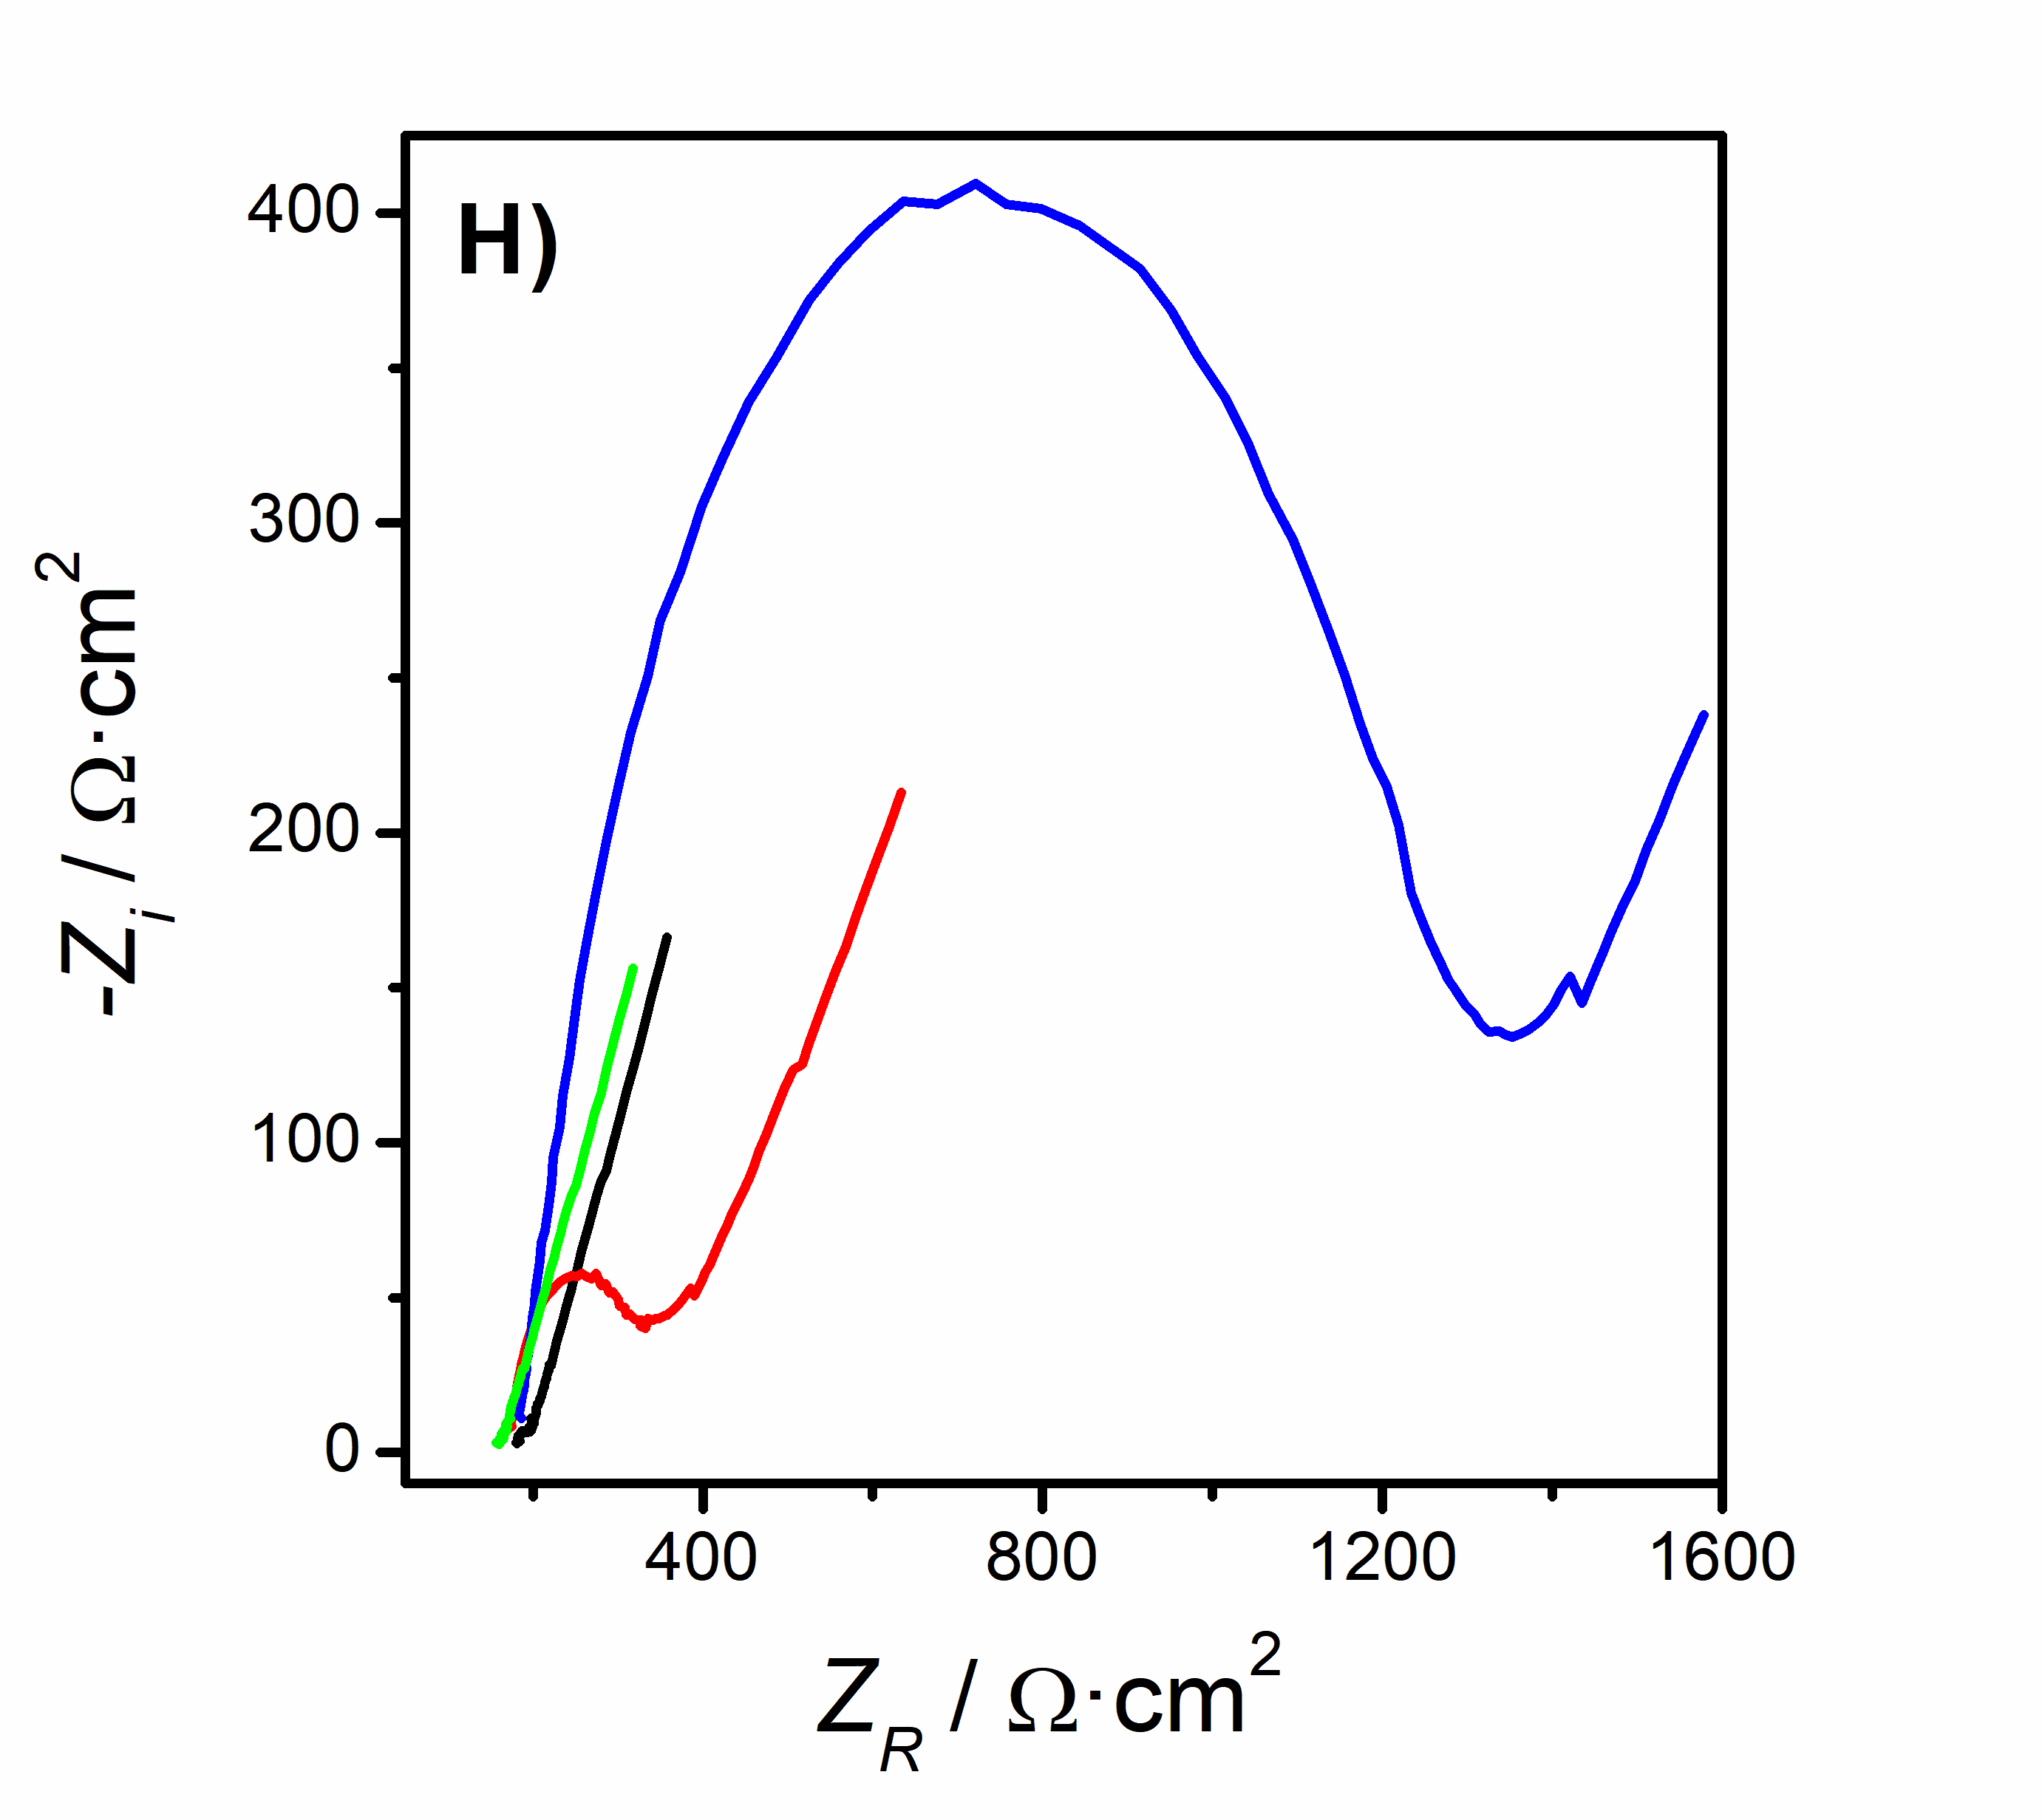
**

**Figure S2** - *CVs (****A****,* ***C****,* ***E****,* ***G****) and Nyquist plots (****B****,* ***D****,* ***F****,* ***H****) acquired for the bare Au (black), Au/AUT (red), Au/AUT/P100 (blue), and Au/P100 electrodes (green) in electrolytes RU7 (****A*** *&* ***B****), RU6 (****C*** *&* ***D****), RU5 (****E*** *&* ***F****), and RU4 (****G*** *&* ***H****). The scan rate and oscillating amplitude for the CVs and impedance spectra were 0.05 V·s-1 and 0.01 V, respectively.*

**Table S1** *– Anodic and cathodic peak current densities (jPA and jPC), potentials (EPA and EPC), peak-to-peak potential difference (∆EP), and apparent charge transfer resistances (R2) derived from the CVs and Nyquist plots in* ***Fig S1****.*

| *pH* | *Electrode* | *jPA / µA·cm2* | *Epa / mV* | *jPC / uA·cm2* | *Epc / mV* | *∆Ep / mV* | *R2 / kΩ* |
| --- | --- | --- | --- | --- | --- | --- | --- |
|  | Au | 331 | 174 | -325 | 101 | 73 | 0.150 |
|  | Au/AUT | 319 | 169 | -317 | 96 | 73 | 0.036 |
| 7 | Au/AUT/P100 | 195 | 249 | -147 | 10 | 239 | 9.395 |
|  | Au/P100 | 329 | 174 | -322 | 91 | 83 | 0.322 |
|  | Au | 321 | 184 | -304 | 97 | 87 | 0.135 |
|  | Au/AUT | 240 | 214 | -196 | 76 | 139 | 5.787 |
| 6 | Au/AUT/P100 | 119 | 317 | - | - | >617 | 34.35 |
|  | Au/P100 | 308 | 178 | -292 | 91 | 87 | 0.522 |
|  | Au | 306 | 181 | -297 | 73 | 108 | 1.207 |
|  | Au/AUT | 308 | 174 | -306 | 84 | 90 | <0.001 |
| 5 | Au/AUT/P100 | 316 | 182 | -293 | 78 | 104 | 0.905 |
|  | Au/P100 | 326 | 168 | -317 | 78 | 89 | 0.273 |
|  | Au | 331 | 168 | -326 | 74 | 94 | 0.399 |
|  | Au/AUT | 262 | 204 | -224 | 67 | 137 | 2.708 |
| 4 | Au/AUT/P100 | 157 | 307 | -109 | 22 | 286 | 19.59 |
|  | Au/P100 | 350 | 171 | -344 | 74 | 97 | 0.076 |

**Table S2** *– Anodic and cathodic peak current densities (jPA and jPC), potentials (EPA and EPC), peak-to-peak potential difference (∆EP), and apparent charge transfer resistances (R2) derived from the CVs and Nyquist plots in* ***Fig S2****.*

| *pH* | *Electrode* | *jPA / µA·cm2* | *Epa / mV* | *jPC / uA·cm2* | *Epc / mV* | *∆Ep / mV* | *R2 / kΩ* |
| --- | --- | --- | --- | --- | --- | --- | --- |
|  | Au | 145 | -260 | -147 | -334 | 74 | <0.001 |
|  | Au/AUT | 150 | -240 | -155 | -329 | 89 | 0.540 |
| 7 | Au/AUT/P100 | 125 | -235 | -144 | -334 | 99 | 1.782 |
|  | Au/P100 | 151 | -255 | -149 | -324 | 69 | <0.001 |
|  | Au | 144 | -240 | -155 | -314 | 74 | <0.001 |
|  | Au/AUT | 102 | -200 | -127 | -340 | 139 | 5.048 |
| 6 | Au/AUT/P100 | 94 | -190 | -130 | -349 | 159 | 5.372 |
|  | Au/P100 | 143 | -225 | -145 | -304 | 79 | <0.001 |
|  | Au | 170 | -237 | -176 | -318 | 81 | <0.001 |
|  | Au/AUT | 146 | -232 | -155 | -327 | 95 | 1.497 |
| 5 | Au/AUT/P100 | 114 | -237 | -121 | -327 | 90 | <0.001 |
|  | Au/P100 | 169 | -247 | -169 | -327 | 80 | <0.001 |
|  | Au | 188 | -244 | -188 | -326 | 82 | <0.001 |
|  | Au/AUT | 53 | 54 | - | - | >754 | 1.631 |
| 4 | Au/AUT/P100 | 16 | 14 | - | - | >714 | 200.0 |
|  | Au/P100 | 187 | -231 | -182 | -334 | 103 | <0.001 |

**B. 2 AFM: Height Profiles**

**
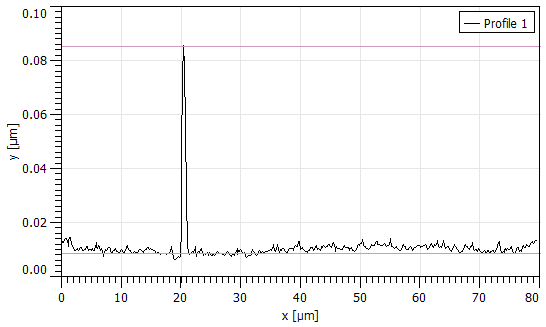
**

≈78 nm

**Figure S3** –*Height profile extracted along the blue line in* ***Fig 3A****.*

*
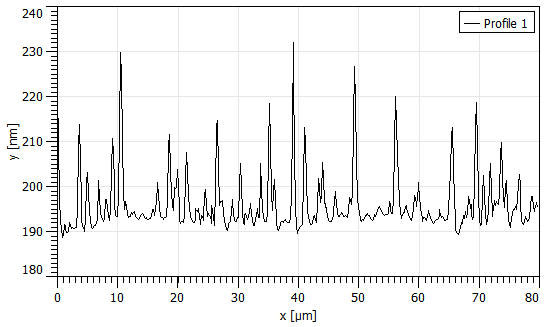
*

**Figure S4** – *Height profile extracted along the red line in* ***Fig 3C****.*
